# Supplementary material for: New Antiproliferative Cembrane Diterpenes from the Red Sea Sarcophyton Species
Source: PubMed Central journal article supplement (PMC6669714; doi:10.3390/md17070411), 2019-07-11
Supplement: marinedrugs-17-00411-s001.pdf [file marinedrugs-17-00411-s001.pdf]

# Supporting Information

## New Antiproliferative Cembrane Diterpenes from the Red Sea *Sarcophyton* Species

Hossam M. Hassan <sup>1</sup>, Mostafa E. Rateb <sup>1,2</sup>, Marwa H. Hassan <sup>1</sup>, Ahmed M. Sayed <sup>3</sup>, Samah Shabana <sup>4</sup>, Mai Raslan <sup>5</sup>, Elham Amin <sup>1,3</sup>, Fathy A. Behery <sup>6,7</sup>, Osama M. Ahmed <sup>8</sup>, Abdullatif Bin Muhsinah <sup>9</sup>, Tobias A. M. Gulder <sup>10,\*</sup> and Usama Ramadan Abdelmohsen <sup>11,\*</sup>

### Contents

|                                                                                            |    |
|--------------------------------------------------------------------------------------------|----|
| Dereplicated metabolites from <i>Sarcophyton</i> sp.                                       | 2  |
| The HRESIMS spectrum of <b>1</b>                                                           | 3  |
| The <sup>1</sup> H NMR (600 MHz, CDCl <sub>3</sub> ) spectrum of <b>1</b>                  | 4  |
| The <sup>13</sup> C NMR (150 MHz, CDCl <sub>3</sub> ) spectrum of <b>1</b>                 | 5  |
| The HSQC (600 MHz, CDCl <sub>3</sub> ) spectrum of <b>1</b>                                | 6  |
| The <sup>1</sup> H- <sup>1</sup> H COSY (600 MHz, CDCl <sub>3</sub> ) spectrum of <b>1</b> | 7  |
| The HMBC (600 MHz, CDCl <sub>3</sub> ) spectrum of <b>1</b>                                | 8  |
| The expanded HMBC (600 MHz, CDCl <sub>3</sub> ) spectrum of <b>1</b>                       | 9  |
| The NOESY (600 MHz, CDCl <sub>3</sub> ) spectrum of <b>1</b>                               | 10 |
| The expanded NOESY (600 MHz, CDCl <sub>3</sub> ) spectrum of <b>1</b>                      | 11 |
| The HRESIMS spectrum of <b>2</b>                                                           | 12 |
| The <sup>1</sup> H NMR (600 MHz, CDCl <sub>3</sub> ) spectrum of <b>2</b>                  | 13 |
| The <sup>13</sup> C NMR (150 MHz, CDCl <sub>3</sub> ) spectrum of <b>2</b>                 | 14 |
| The HSQC (600 MHz, CDCl <sub>3</sub> ) spectrum of <b>2</b>                                | 15 |
| The <sup>1</sup> H- <sup>1</sup> H COSY (600 MHz, CDCl <sub>3</sub> ) spectrum of <b>2</b> | 16 |
| The HMBC (600 MHz, CDCl <sub>3</sub> ) spectrum of <b>2</b>                                | 17 |
| The HRESIMS spectrum of <b>3</b>                                                           | 18 |
| The <sup>1</sup> H NMR (600 MHz, CDCl <sub>3</sub> ) spectrum of <b>3</b>                  | 19 |
| The <sup>13</sup> C NMR (150 MHz, CDCl <sub>3</sub> ) spectrum of <b>3</b>                 | 20 |
| The HSQC (600 MHz, CDCl <sub>3</sub> ) spectrum of <b>3</b>                                | 21 |
| The <sup>1</sup> H- <sup>1</sup> H COSY (600 MHz, CDCl <sub>3</sub> ) spectrum of <b>3</b> | 22 |
| The HMBC (600 MHz, CDCl <sub>3</sub> ) spectrum of <b>3</b>                                | 23 |
| The NOESY (600 MHz, CDCl <sub>3</sub> ) spectrum of <b>3</b>                               | 24 |
| The HRESIMS spectrum of <b>4</b>                                                           | 25 |
| The <sup>1</sup> H NMR (600 MHz, CDCl <sub>3</sub> ) spectrum of <b>4</b>                  | 26 |
| The <sup>13</sup> C NMR (150 MHz, CDCl <sub>3</sub> ) spectrum of <b>4</b>                 | 27 |
| The HSQC (600 MHz, CDCl <sub>3</sub> ) spectrum of <b>4</b>                                | 28 |
| The <sup>1</sup> H- <sup>1</sup> H COSY (600 MHz, CDCl <sub>3</sub> ) spectrum of <b>4</b> | 29 |
| The HMBC (600 MHz, CDCl <sub>3</sub> ) spectrum of <b>4</b>                                | 30 |
| The NOESY (600 MHz, CDCl <sub>3</sub> ) spectrum of <b>4</b>                               | 31 |
| The HRESIMS spectrum of <b>5</b>                                                           | 32 |
| The <sup>1</sup> H NMR (600 MHz, CDCl <sub>3</sub> ) spectrum of <b>5</b>                  | 33 |
| The <sup>13</sup> C NMR (150 MHz, CDCl <sub>3</sub> ) spectrum of <b>5</b>                 | 34 |
| The HSQC (600 MHz, CDCl <sub>3</sub> ) spectrum of <b>5</b>                                | 35 |
| The <sup>1</sup> H- <sup>1</sup> H COSY (600 MHz, CDCl <sub>3</sub> ) spectrum of <b>5</b> | 36 |
| The HMBC (600 MHz, CDCl <sub>3</sub> ) spectrum of <b>5</b>                                | 37 |
| The NOESY (600 MHz, CDCl <sub>3</sub> ) spectrum of <b>5</b>                               | 38 |

**Table S1.** Dereplicated metabolites from *Sarcophyton* sp.

| No. | Molecular formula                                             | Identification                                                                |
|-----|---------------------------------------------------------------|-------------------------------------------------------------------------------|
| 1   | C <sub>14</sub> H <sub>22</sub> O                             | Lobocalone                                                                    |
| 2   | C <sub>18</sub> H <sub>37</sub> NO                            | NO HITS from <i>Sarcophyton</i>                                               |
| 3   | C <sub>20</sub> H <sub>26</sub> O <sub>3</sub>                | lobophytolide C                                                               |
| 4   | C <sub>20</sub> H <sub>26</sub> O <sub>3</sub>                | Glaucopine C                                                                  |
| 5   | C <sub>20</sub> H <sub>28</sub> O                             | Sinulobatin B                                                                 |
| 6   | C <sub>20</sub> H <sub>28</sub> O <sub>2</sub>                | Kaurenolide; ent-16-Kauren-19,6 $\beta$ -olide                                |
| 7   | C <sub>20</sub> H <sub>28</sub> O <sub>3</sub>                | Sarcophine                                                                    |
| 8   | C <sub>20</sub> H <sub>28</sub> O <sub>4</sub>                | 9 $\beta$ -hydroxysarcophine                                                  |
| 9   | C <sub>20</sub> H <sub>30</sub> O                             | Sarcophytonin-A                                                               |
| 10  | C <sub>20</sub> H <sub>30</sub> O <sub>2</sub>                | 16-Deoxysarcophine                                                            |
| 11  | C <sub>20</sub> H <sub>30</sub> O <sub>6</sub>                | Sinulariolone                                                                 |
| 12  | C <sub>20</sub> H <sub>31</sub> O <sub>5</sub> N              | 5 $\alpha$ ,12-Dihydroxy-1-tremulen-11-yl 2(S)-pyroglutamat                   |
| 13  | C <sub>20</sub> H <sub>31</sub> O <sub>4</sub> N              | lepadin C                                                                     |
| 14  | C <sub>20</sub> H <sub>33</sub> O <sub>4</sub> N              | NO HITS from <i>Sarcophyton</i>                                               |
| 15  | C <sub>20</sub> H <sub>33</sub> O <sub>6</sub> N              | NO HITS from <i>Sarcophyton</i>                                               |
| 16  | C <sub>20</sub> H <sub>34</sub> O <sub>8</sub>                | Botcinolide                                                                   |
| 17  | C <sub>21</sub> H <sub>36</sub> O <sub>4</sub>                | Sclerophytin F methyl ether                                                   |
| 18  | C <sub>22</sub> H <sub>30</sub> O <sub>5</sub>                | Lobophytol acetate                                                            |
| 19  | C <sub>22</sub> H <sub>42</sub> O <sub>4</sub>                | NO HITS from <i>Sarcophyton</i>                                               |
| 20  | C <sub>24</sub> H <sub>24</sub> O                             | NO HITS from <i>Sarcophyton</i>                                               |
| 21  | C <sub>24</sub> H <sub>24</sub> O <sub>7</sub>                | NO HITS from <i>Sarcophyton</i>                                               |
| 22  | C <sub>24</sub> H <sub>36</sub> O <sub>4</sub>                | Secosarcophinolide                                                            |
| 23  | C <sub>24</sub> H <sub>46</sub> O <sub>7</sub>                | NO HITS from <i>Sarcophyton</i>                                               |
| 24  | C <sub>26</sub> H <sub>24</sub> O                             | NO HITS from <i>Sarcophyton</i>                                               |
| 25  | C <sub>26</sub> H <sub>24</sub> O <sub>2</sub>                | NO HITS from <i>Sarcophyton</i>                                               |
| 26  | C <sub>26</sub> H <sub>28</sub> O <sub>3</sub>                | NO HITS from <i>Sarcophyton</i>                                               |
| 27  | C <sub>26</sub> H <sub>42</sub> O <sub>4</sub>                | Dihydroxy-24-methylscalaran-25,24-olide                                       |
| 28  | C <sub>26</sub> H <sub>44</sub> O <sub>7</sub>                | 24-methyl-bisnor-cholest-22-ene-heptol                                        |
| 29  | C <sub>26</sub> H <sub>47</sub> O <sub>5</sub> N <sub>3</sub> | NO HITS from <i>Sarcophyton</i>                                               |
| 30  | C <sub>26</sub> H <sub>48</sub> O <sub>2</sub>                | NO HITS from <i>Sarcophyton</i>                                               |
| 31  | C <sub>28</sub> H <sub>44</sub> O                             | NO HITS from <i>Sarcophyton</i>                                               |
| 32  | C <sub>28</sub> H <sub>46</sub> O <sub>2</sub>                | NO HITS from <i>Sarcophyton</i>                                               |
| 33  | C <sub>28</sub> H <sub>46</sub> O <sub>4</sub>                | 3 $\beta$ ,5 $\alpha$ ,6 $\beta$ ,9 $\alpha$ -Tetrahydroxy-ergosta-7,22-diene |
| 34  | C <sub>28</sub> H <sub>51</sub> O <sub>5</sub> N <sub>3</sub> | NO HITS from <i>Sarcophyton</i>                                               |
| 35  | C <sub>32</sub> H <sub>44</sub> O <sub>8</sub>                | NO HITS from <i>Sarcophyton</i>                                               |
| 36  | C <sub>47</sub> H <sub>60</sub> O                             | NO HITS from <i>Sarcophyton</i>                                               |

F: FTMS + p ESI Full ms [100.00-2000.00]

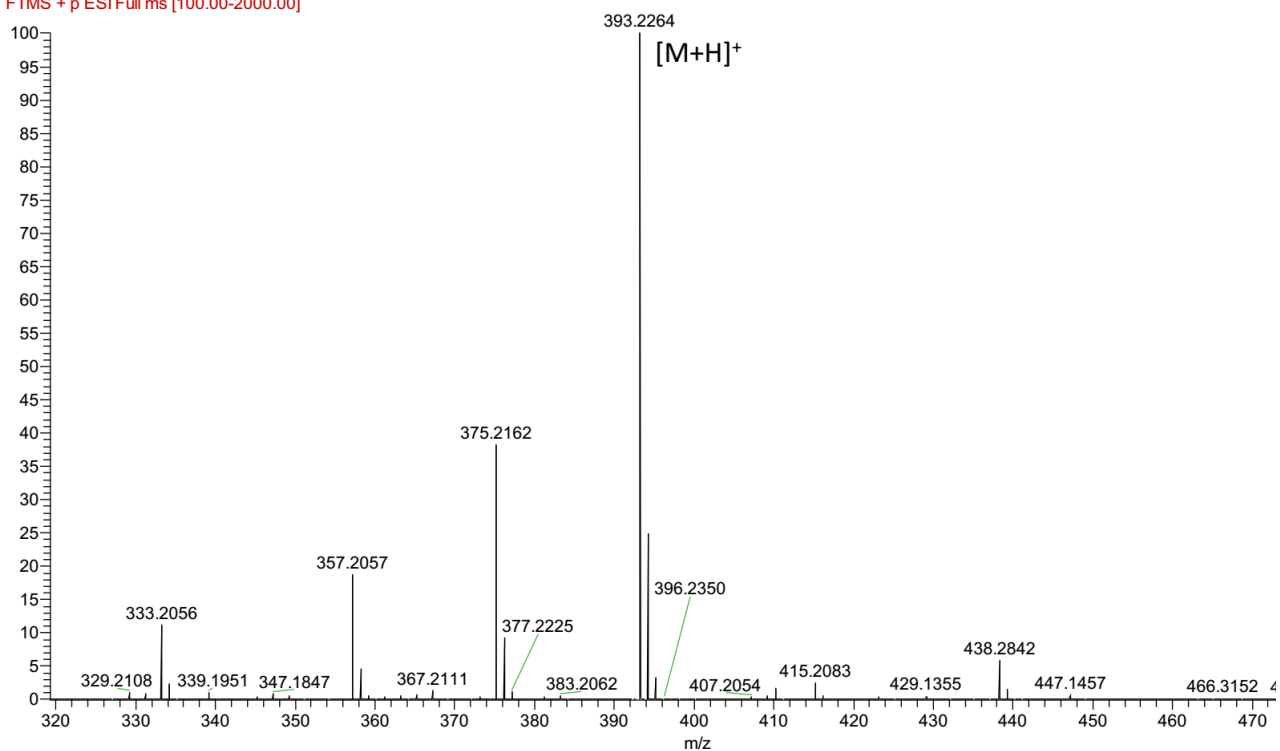

Fig.S1. The HRESIMS spectrum of **1**.

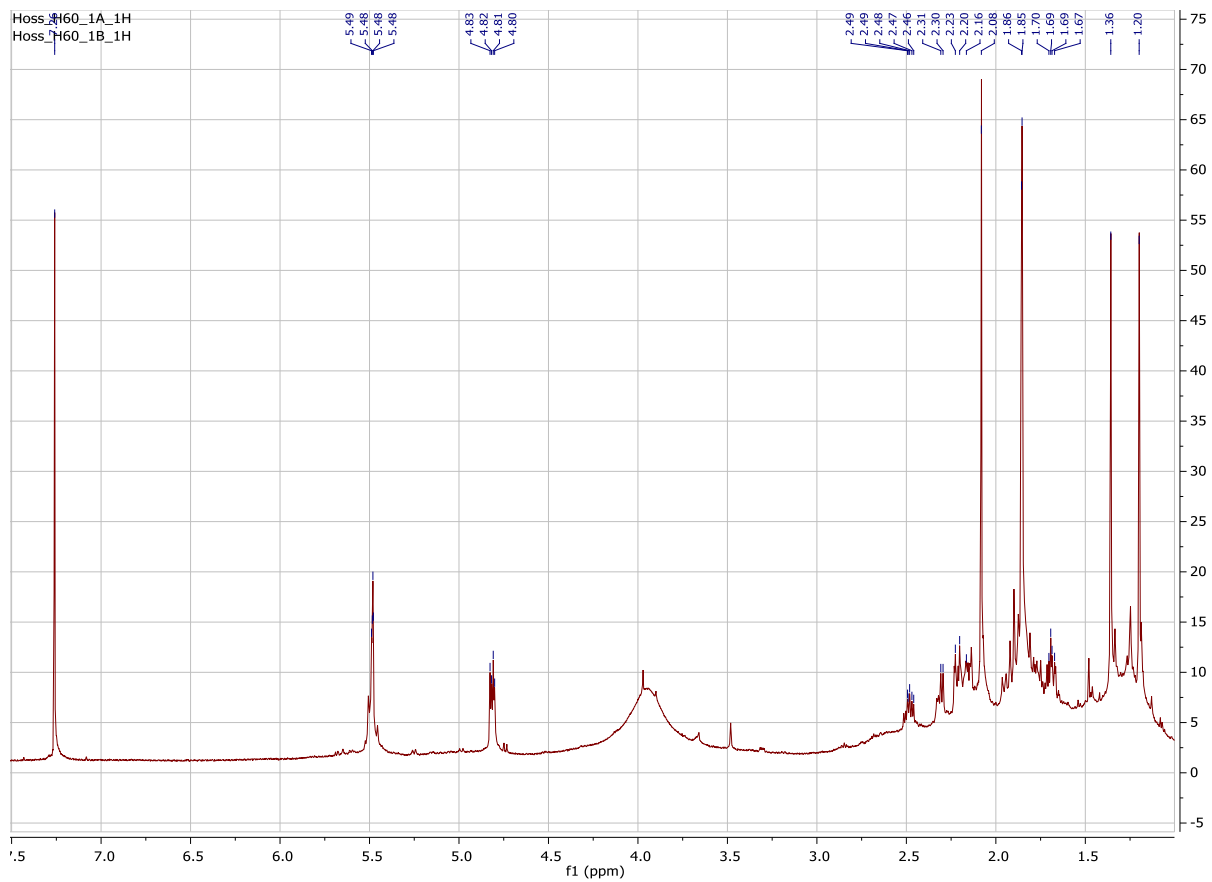

Fig.S2. The  $^1\text{H}$  NMR (600 MHz,  $\text{CDCl}_3$ ) spectrum of **1**.

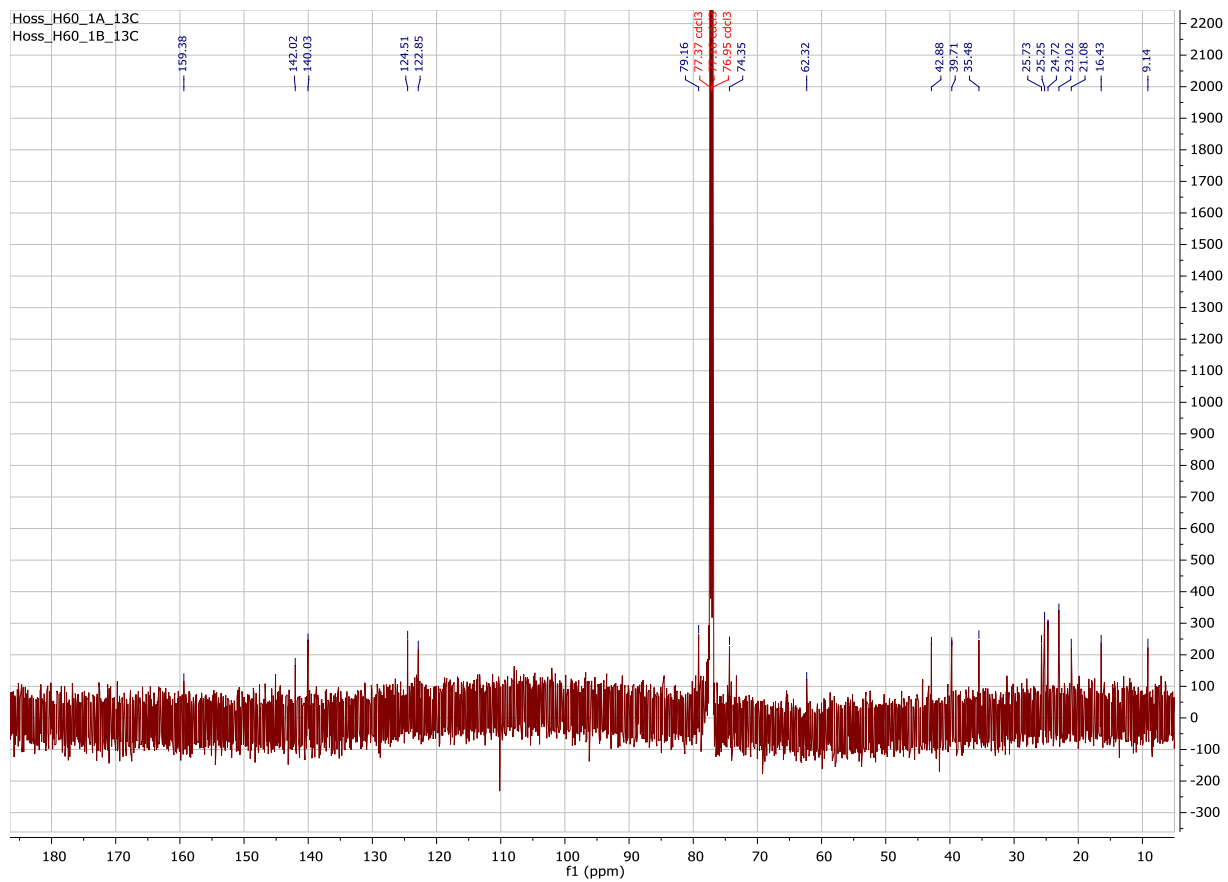

Fig.S3.The  $^{13}\text{C}$  NMR (150 MHz,  $\text{CDCl}_3$ ) spectrum of **1**

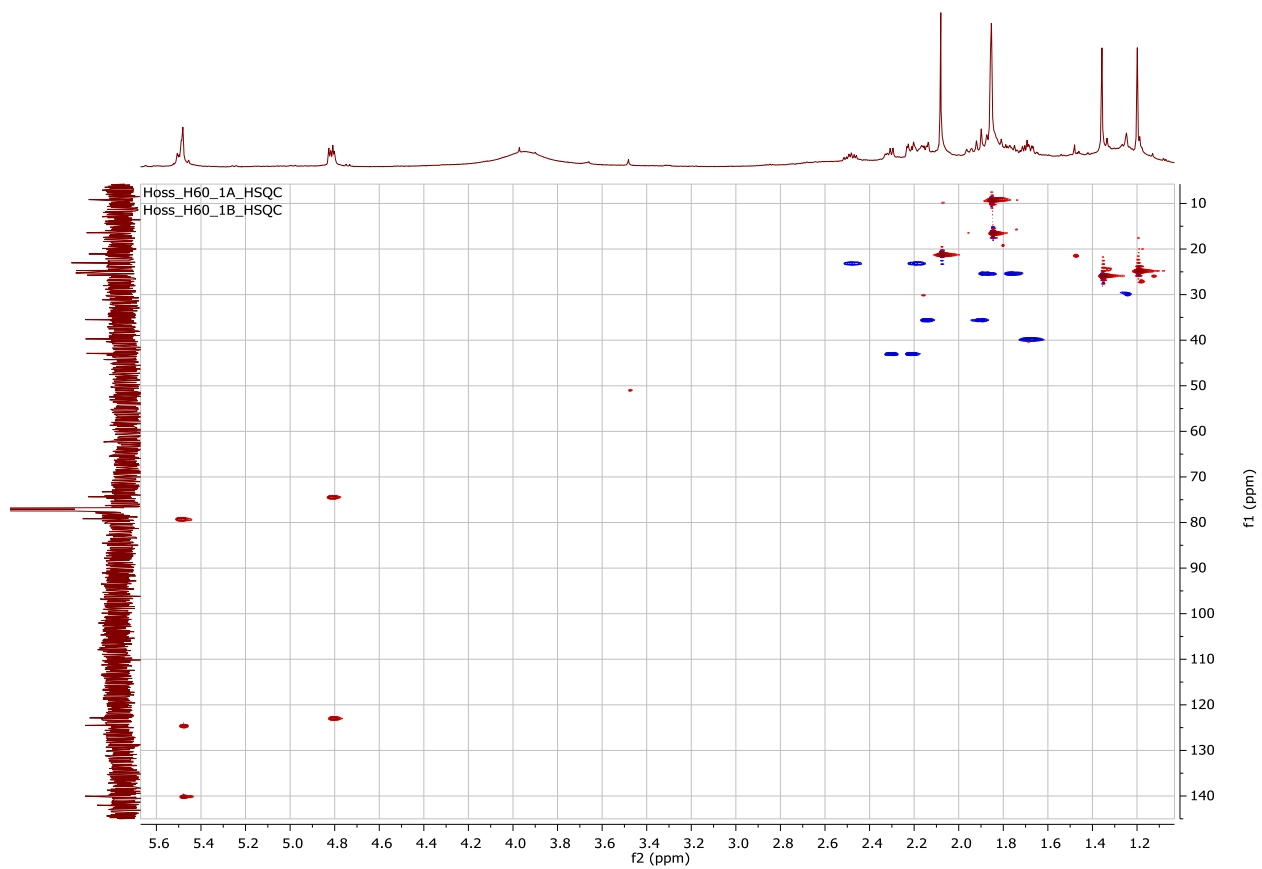

Fig.S4.The HSQC (600 MHz, CDCl<sub>3</sub>) spectrum of **1**

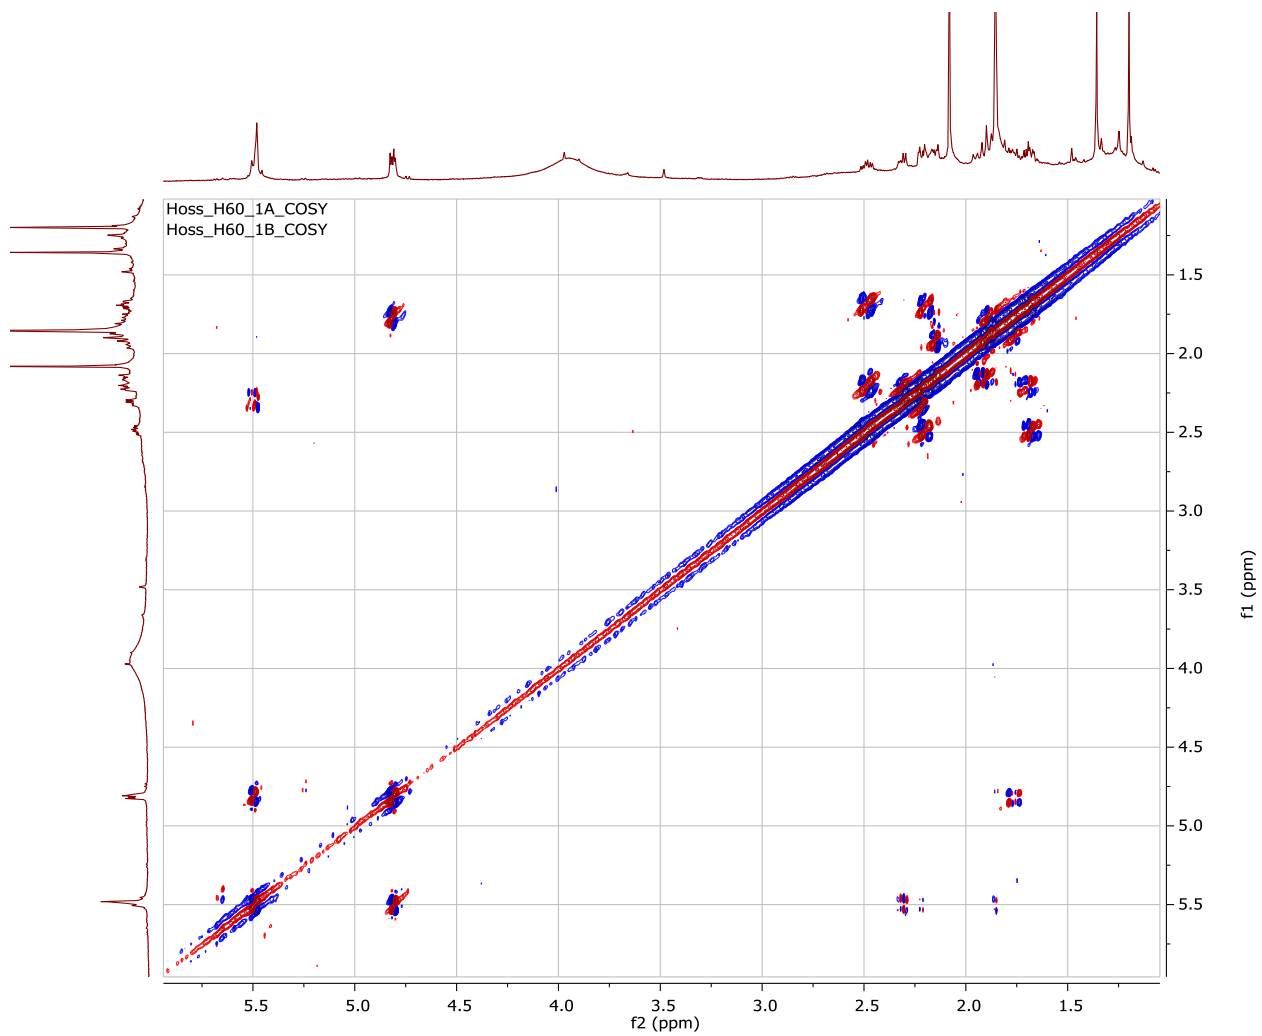

Fig.S5.The  $^1\text{H}$ - $^1\text{H}$  COSY (600 MHz,  $\text{CDCl}_3$ ) spectrum of **1**

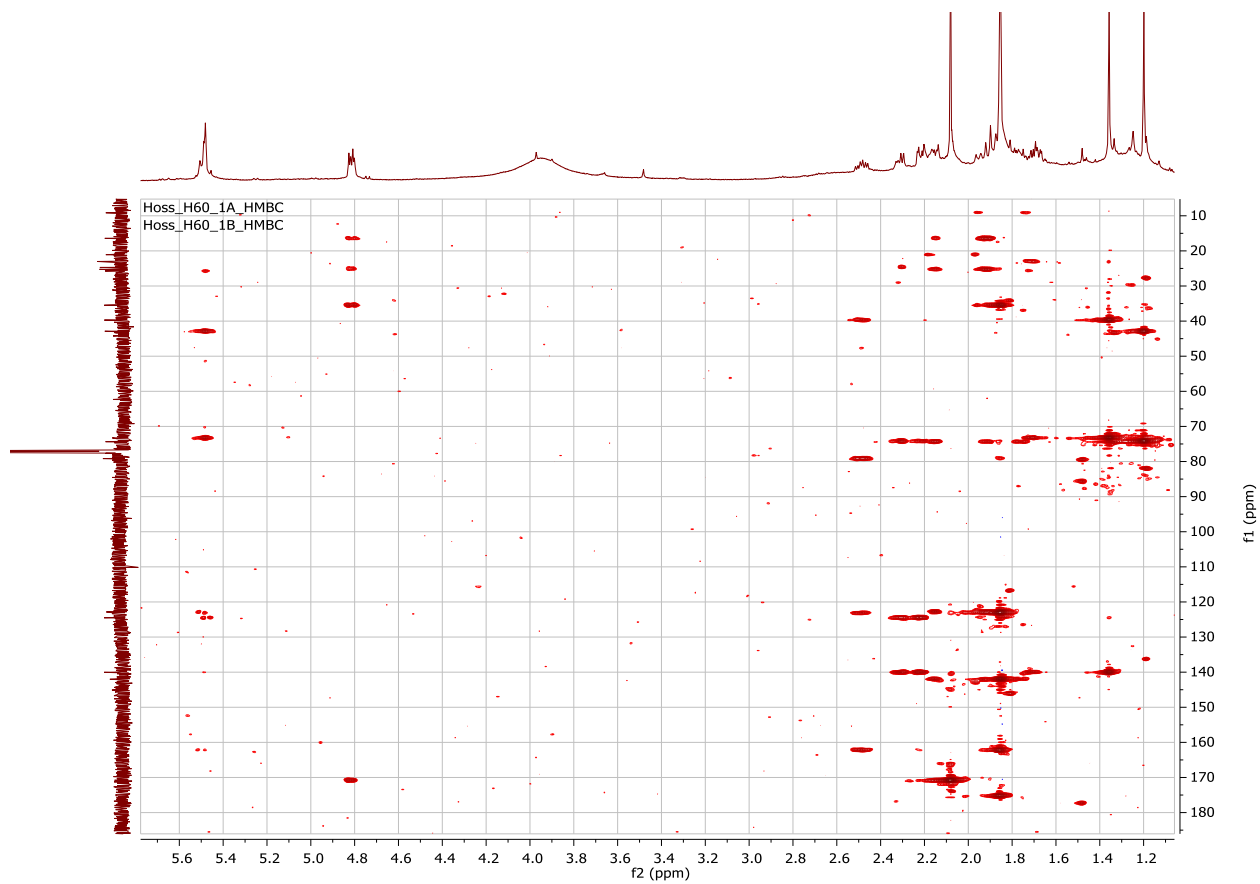

Fig.S6.The HMBC (600 MHz, CDCl<sub>3</sub>) spectrum of **1**



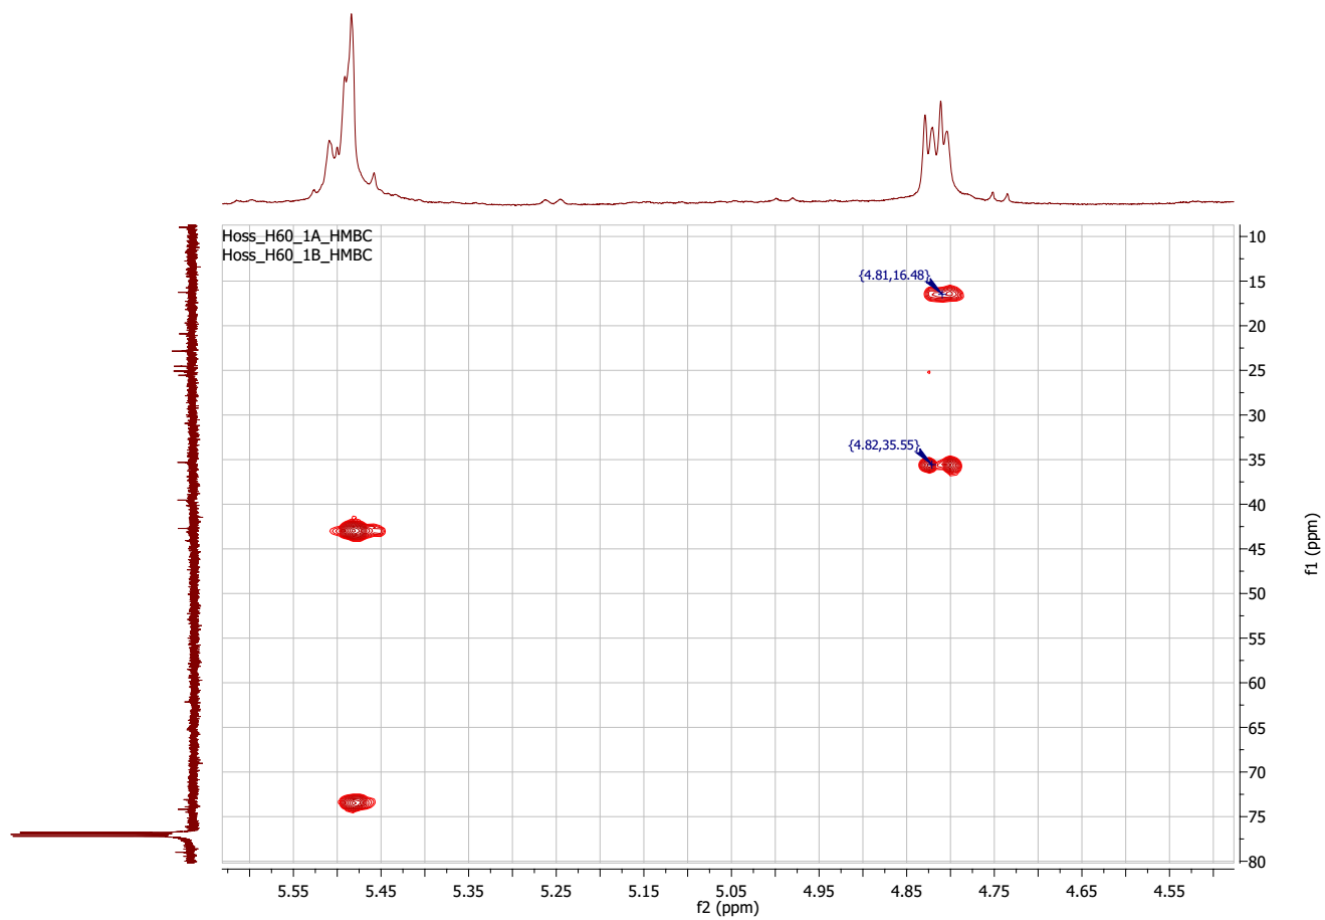

Fig.S7.The expanded HMBC (600 MHz, CDCl<sub>3</sub>) spectrum of **1**

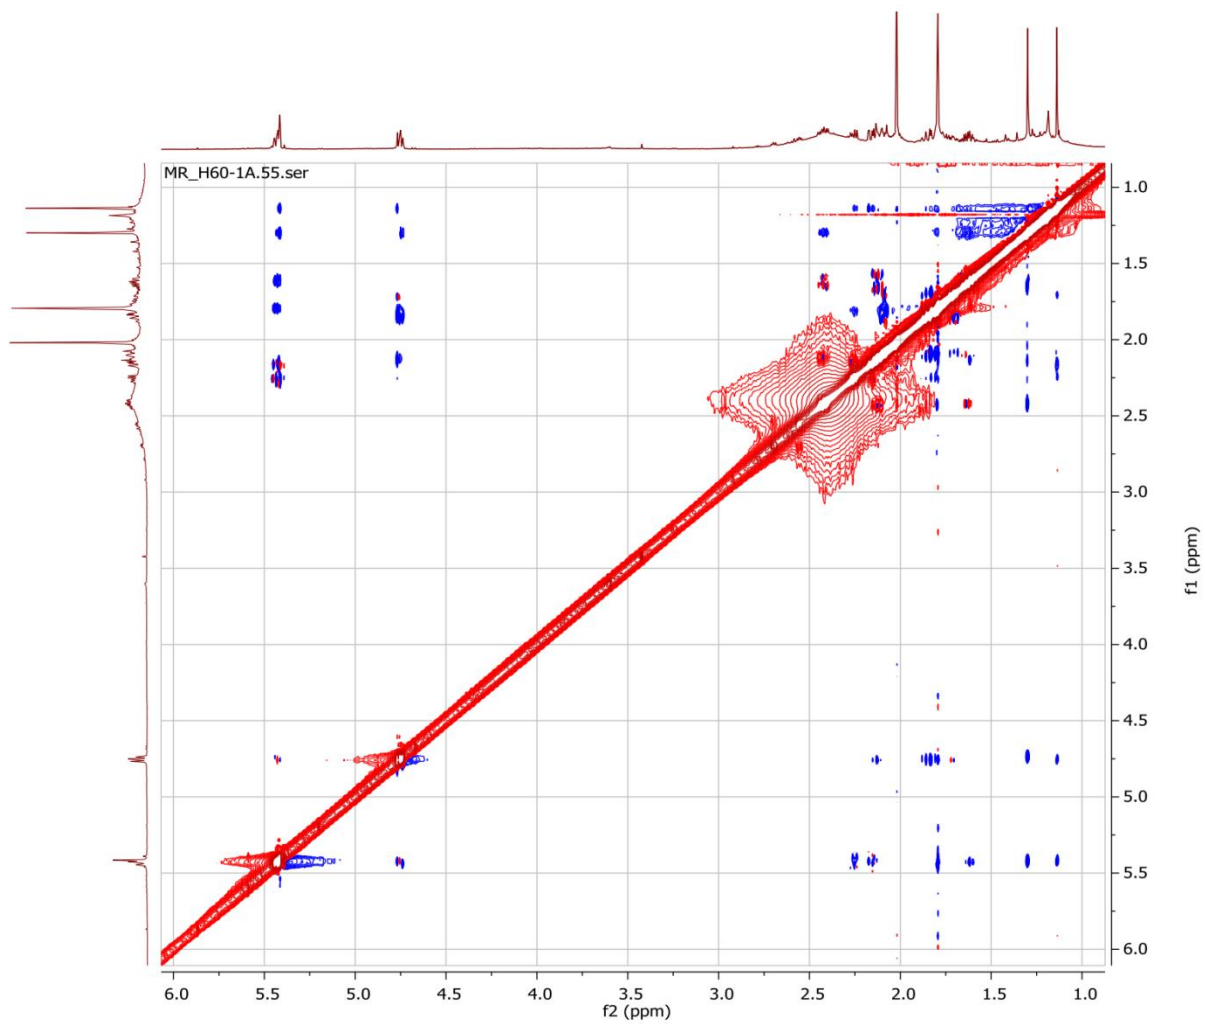

Fig.S8. The NOESY (600 MHz, CDCl<sub>3</sub>) spectrum of **1**

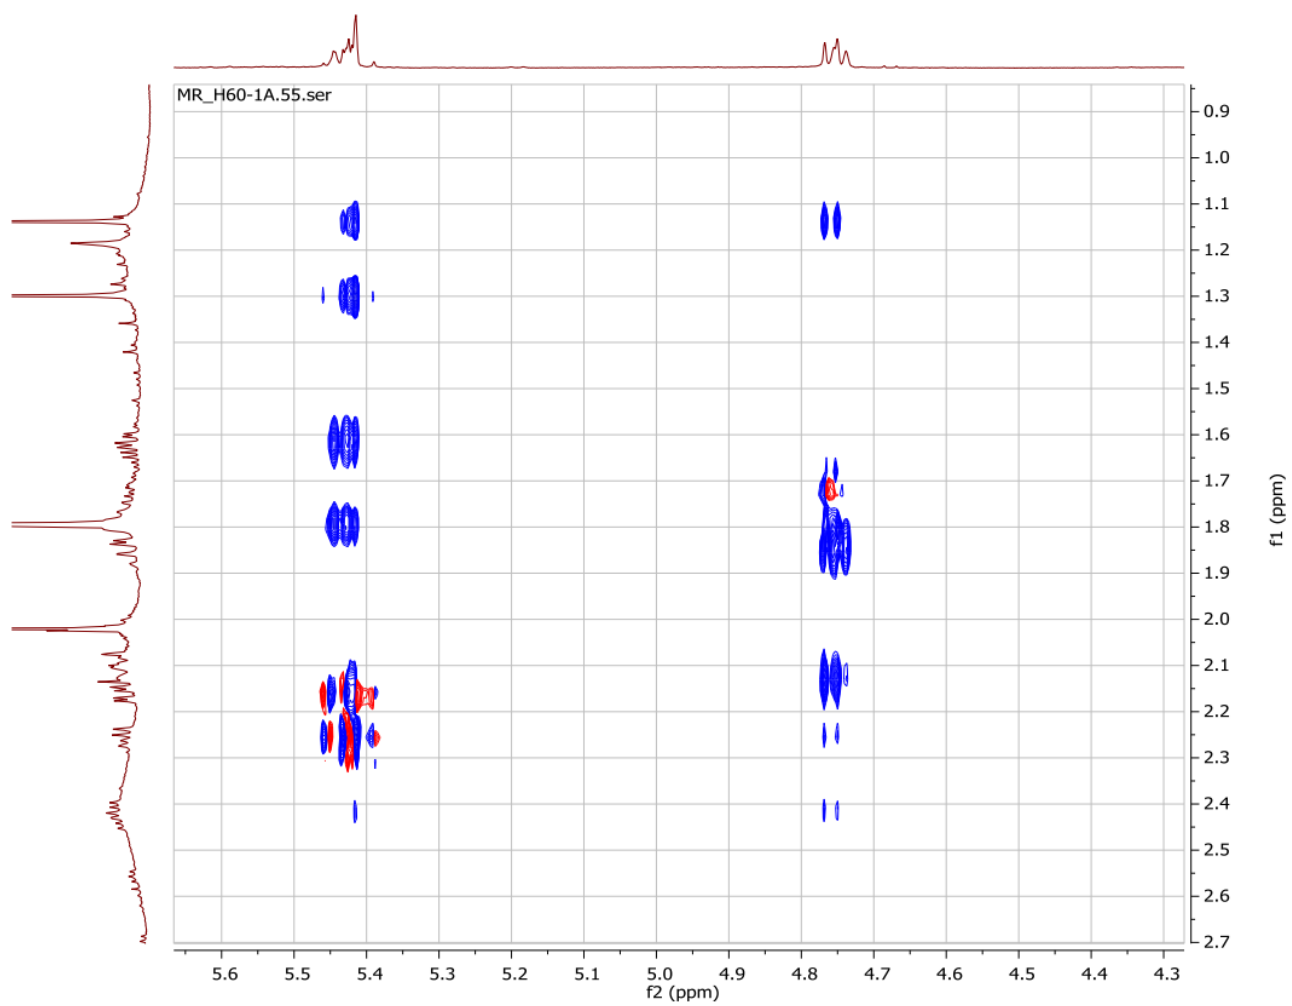

Fig.S9. The expanded NOESY (600 MHz,  $\text{CDCl}_3$ ) spectrum of **1**

F: FTMS + p ESI Full ms [100.00-2000.00]

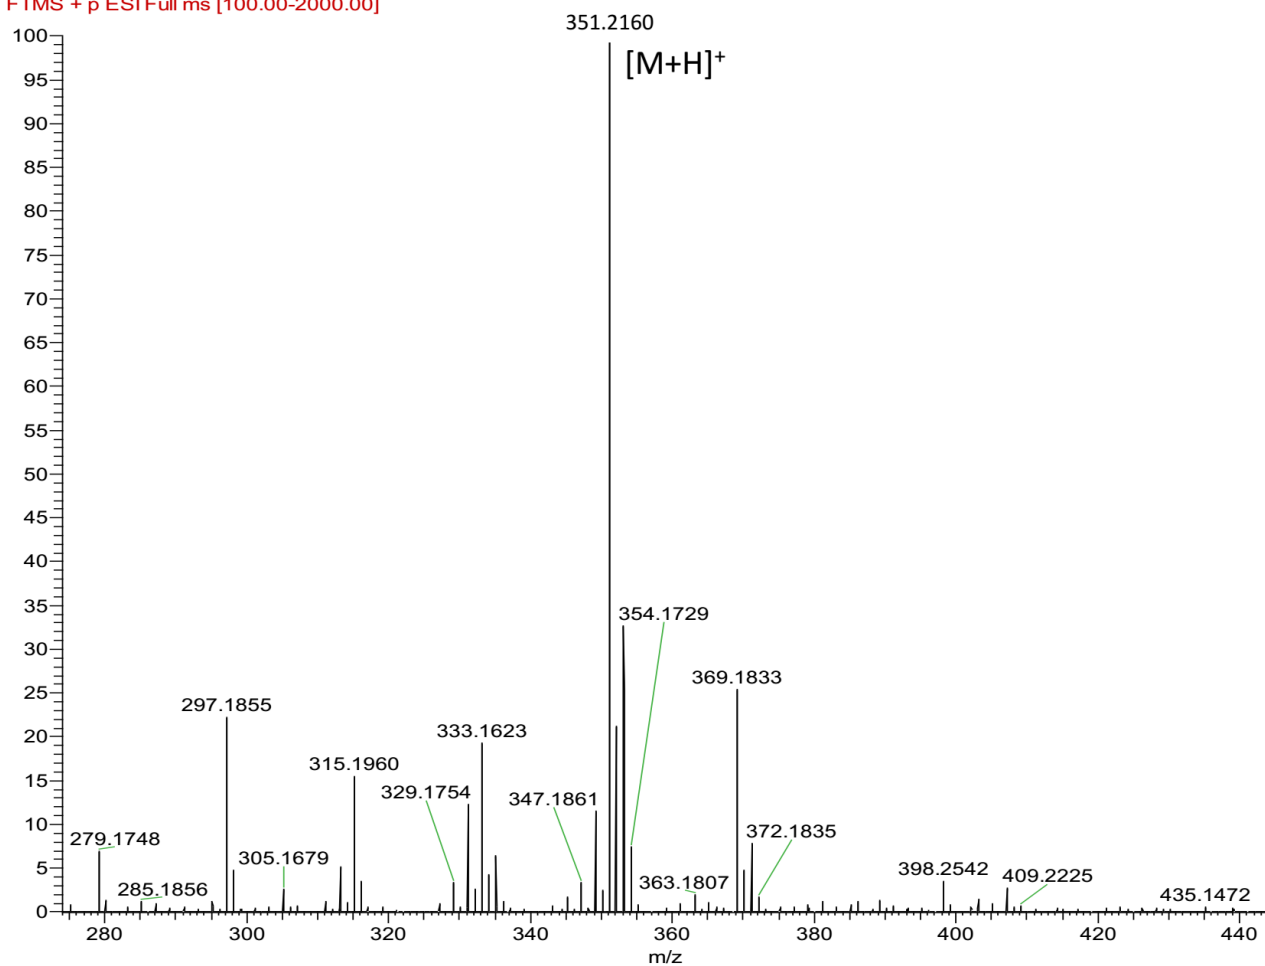

Fig.S10. The HRESIMS spectrum of **2**.

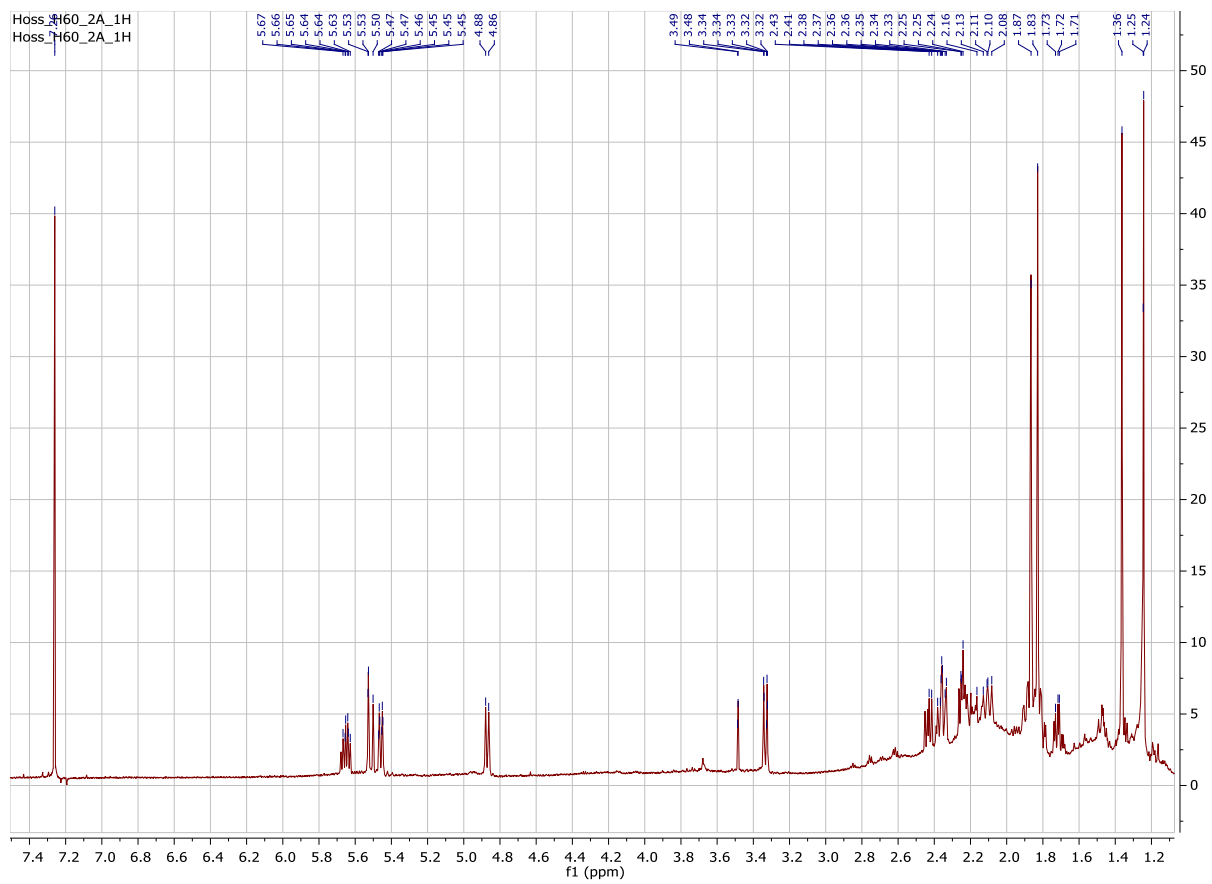

Fig.S11.The  $^1\text{H}$  NMR (600 MHz,  $\text{CDCl}_3$ ) spectrum of **2**

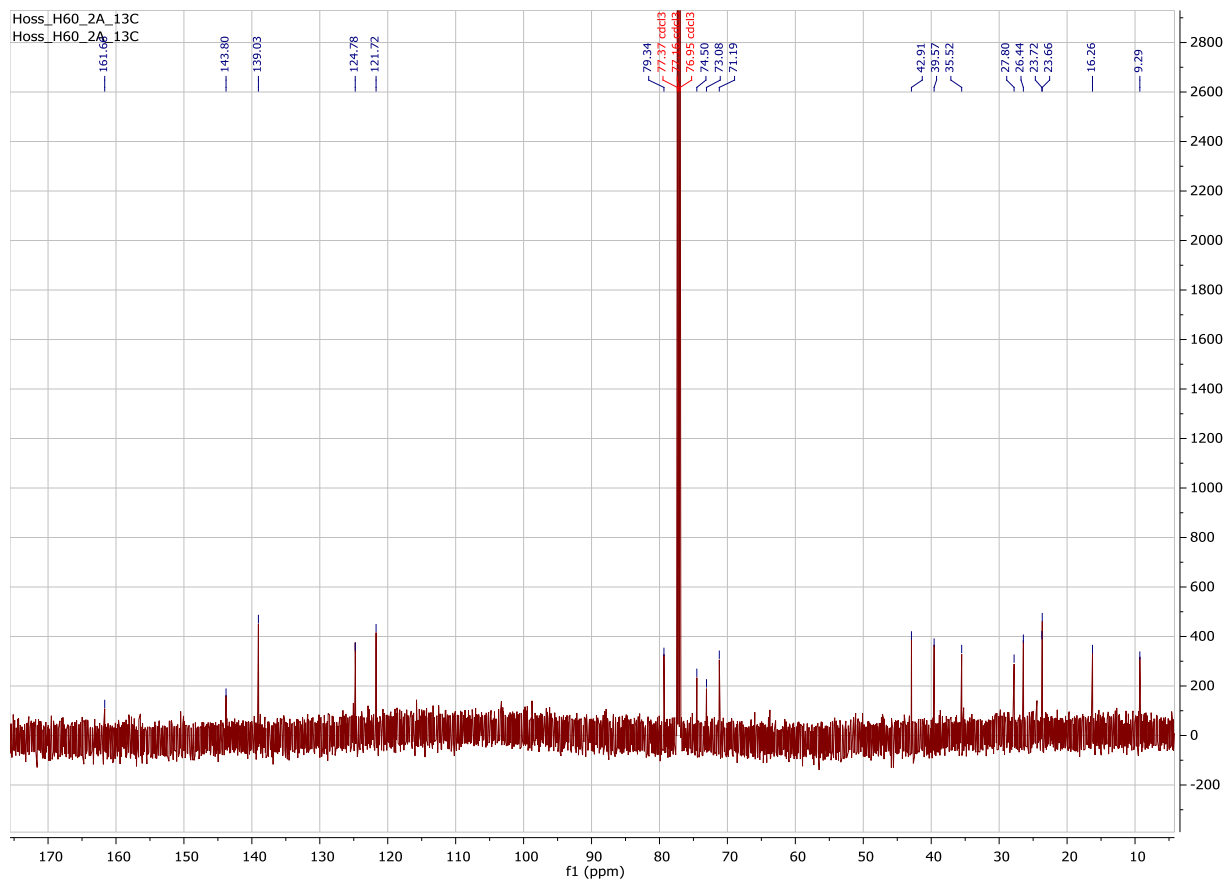

Fig.S12.The  $^{13}\text{C}$  NMR (150 MHz,  $\text{CDCl}_3$ ) spectrum of **2**

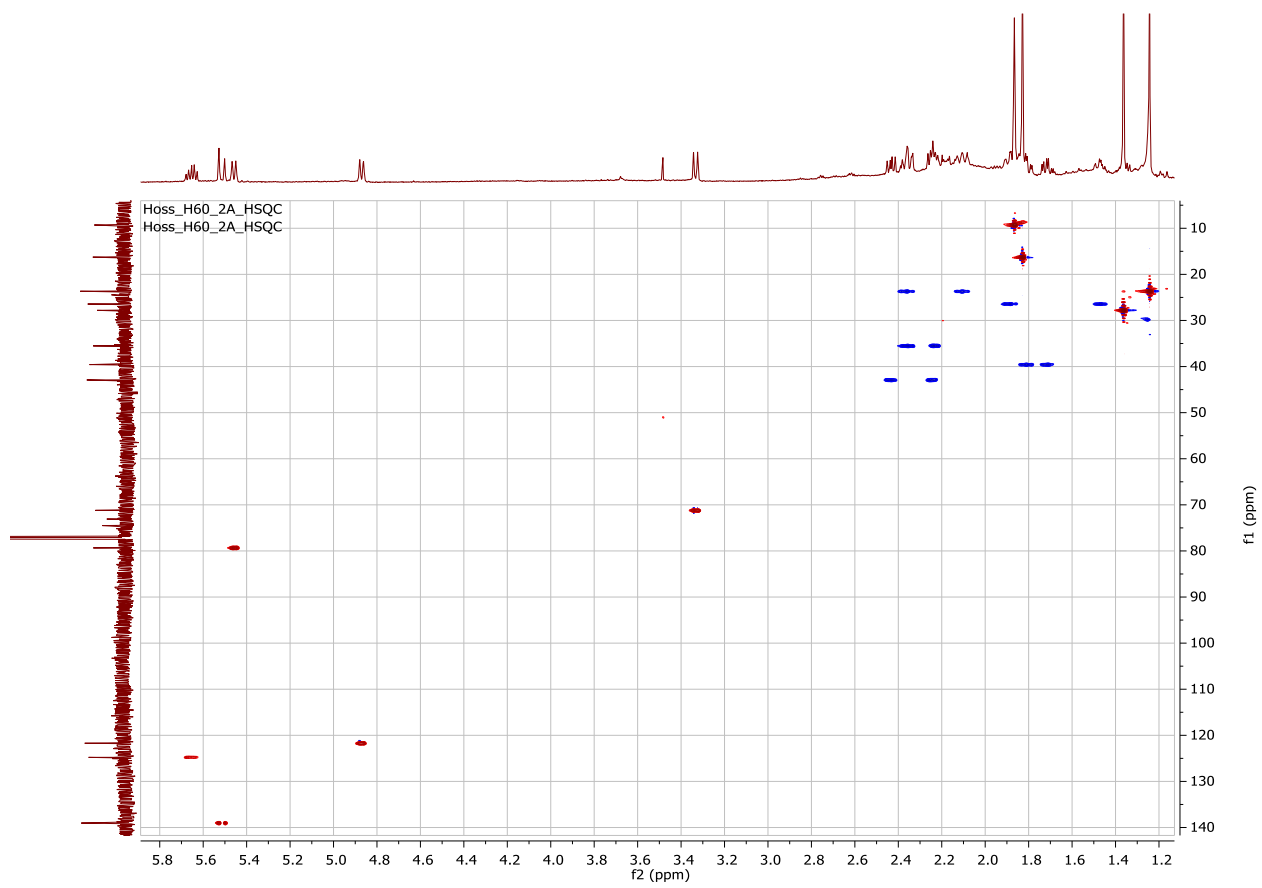

Fig.S13.The HSQC (600 MHz,  $\text{CDCl}_3$ ) spectrum of **2**

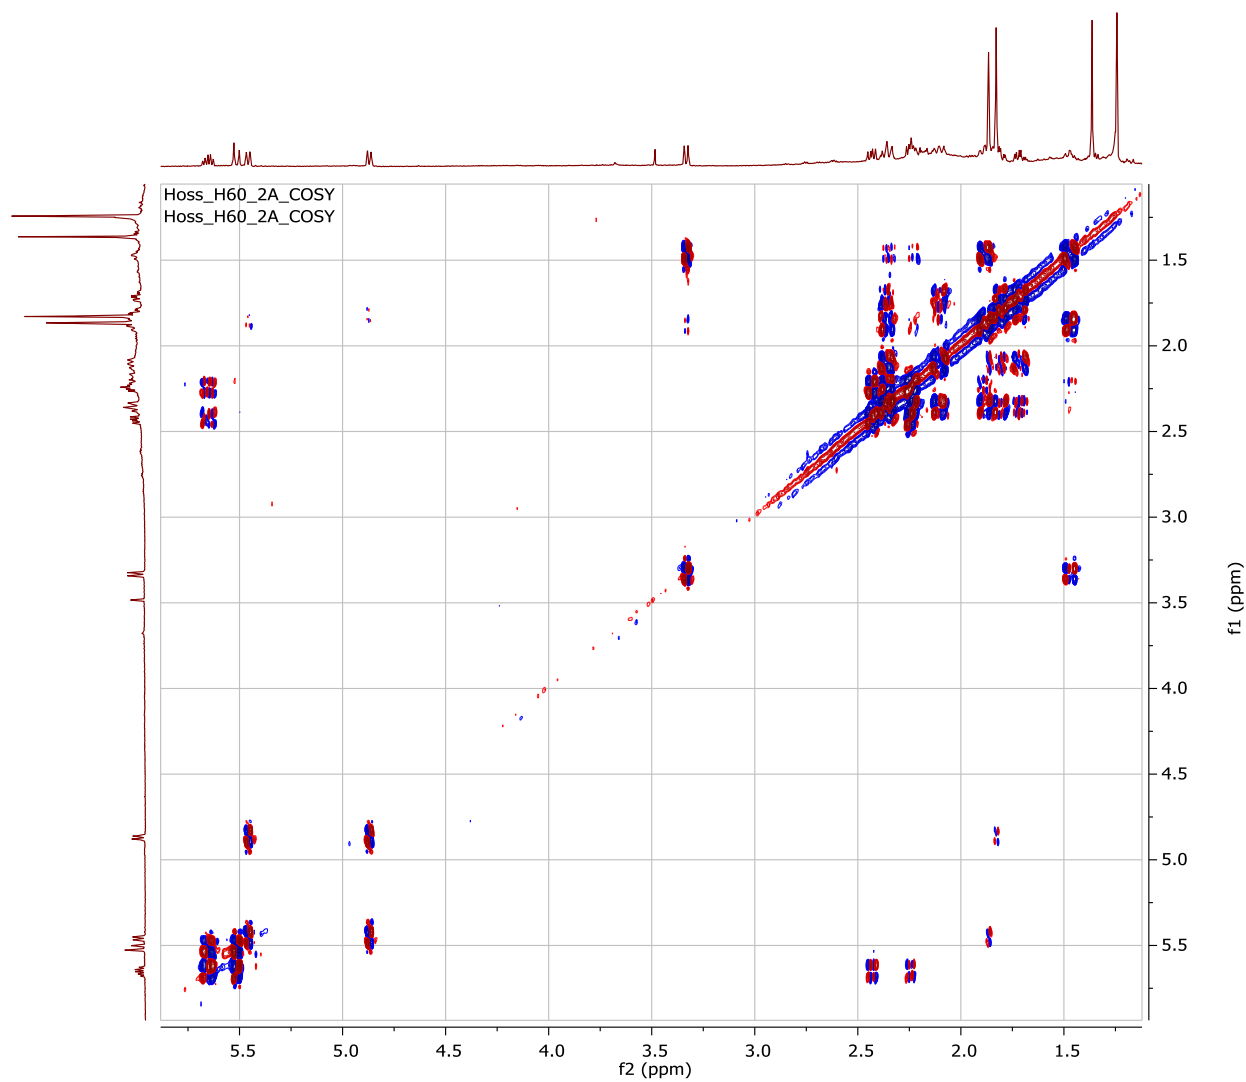

Fig.S14. The  $^1\text{H}$ - $^1\text{H}$  COSY (600 MHz,  $\text{CDCl}_3$ ) spectrum of **2**



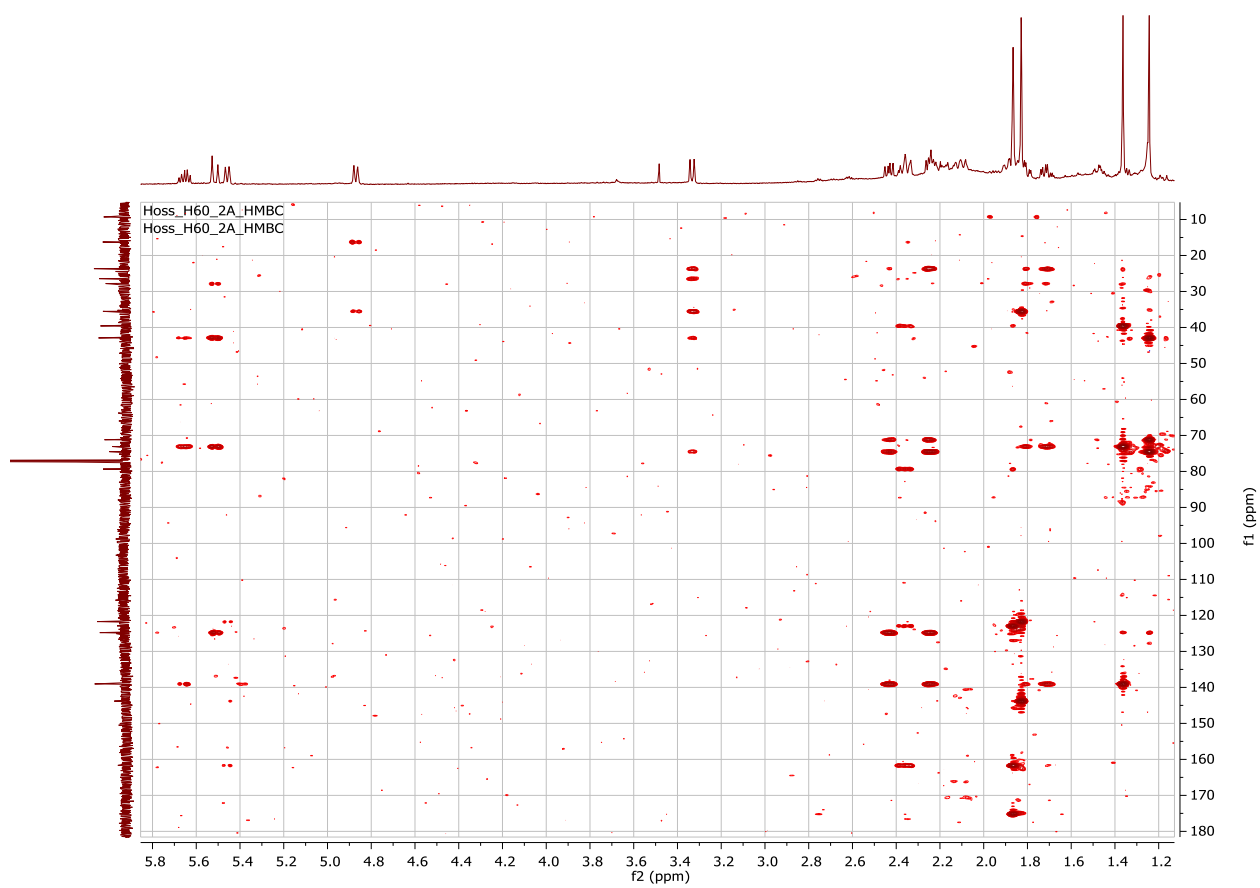

Fig.S15.The HMBC (600 MHz, CDCl<sub>3</sub>) spectrum of **2**

F: FTMS + p ESI Full ms [100.00-2000.00]

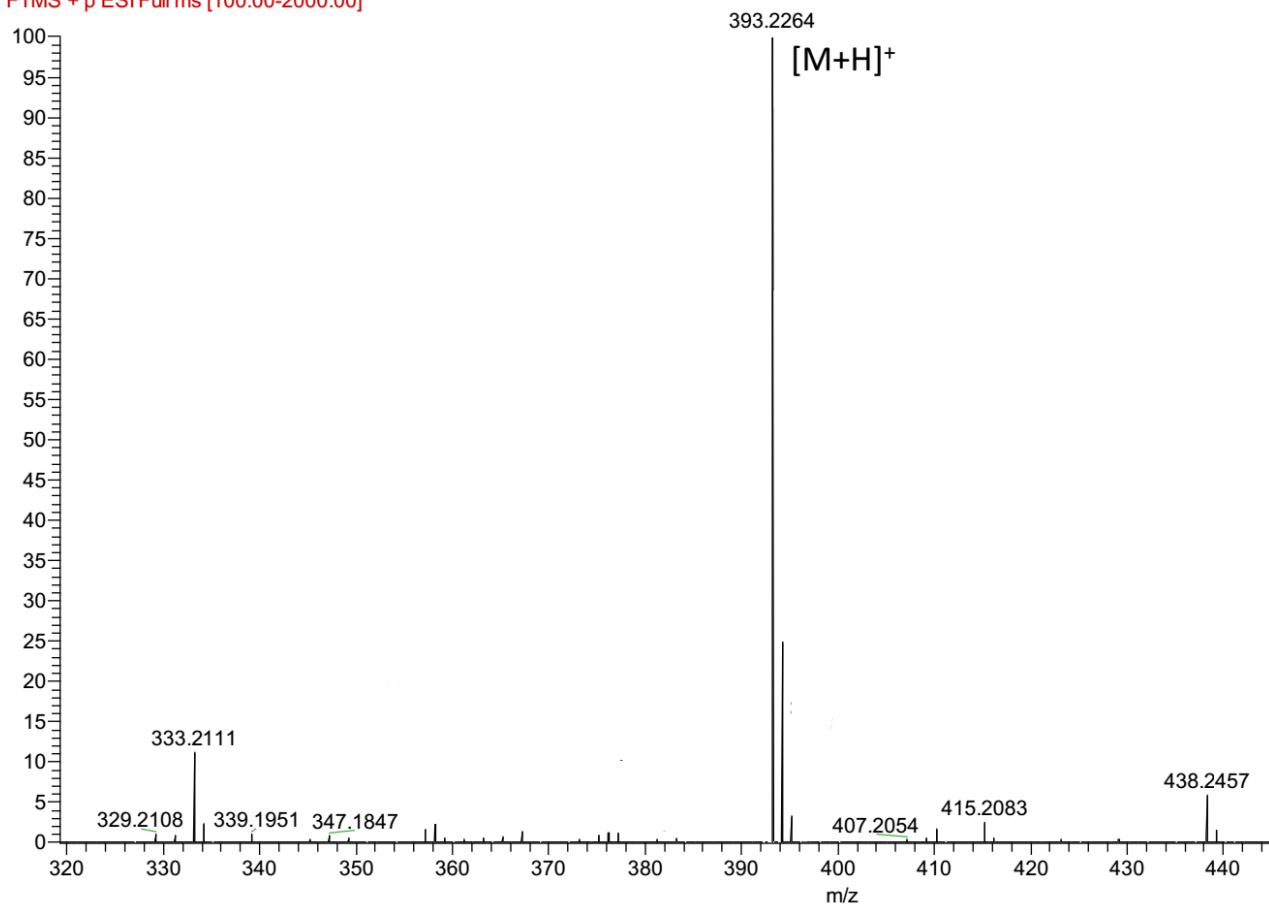

Fig.S16. The HRESIMS spectrum of **3**.

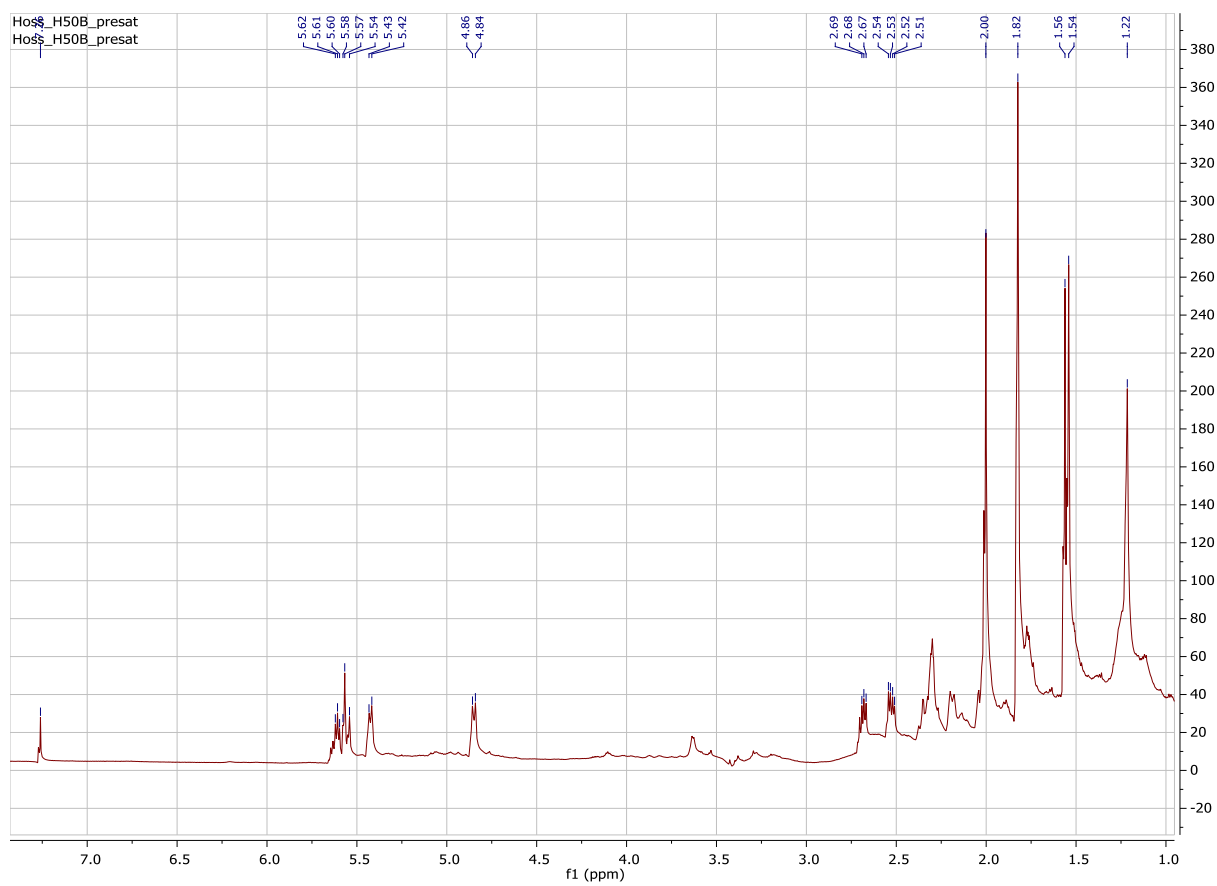

Fig.S17.The  $^1\text{H}$  NMR (600 MHz,  $\text{CDCl}_3$ ) spectrum of **3**

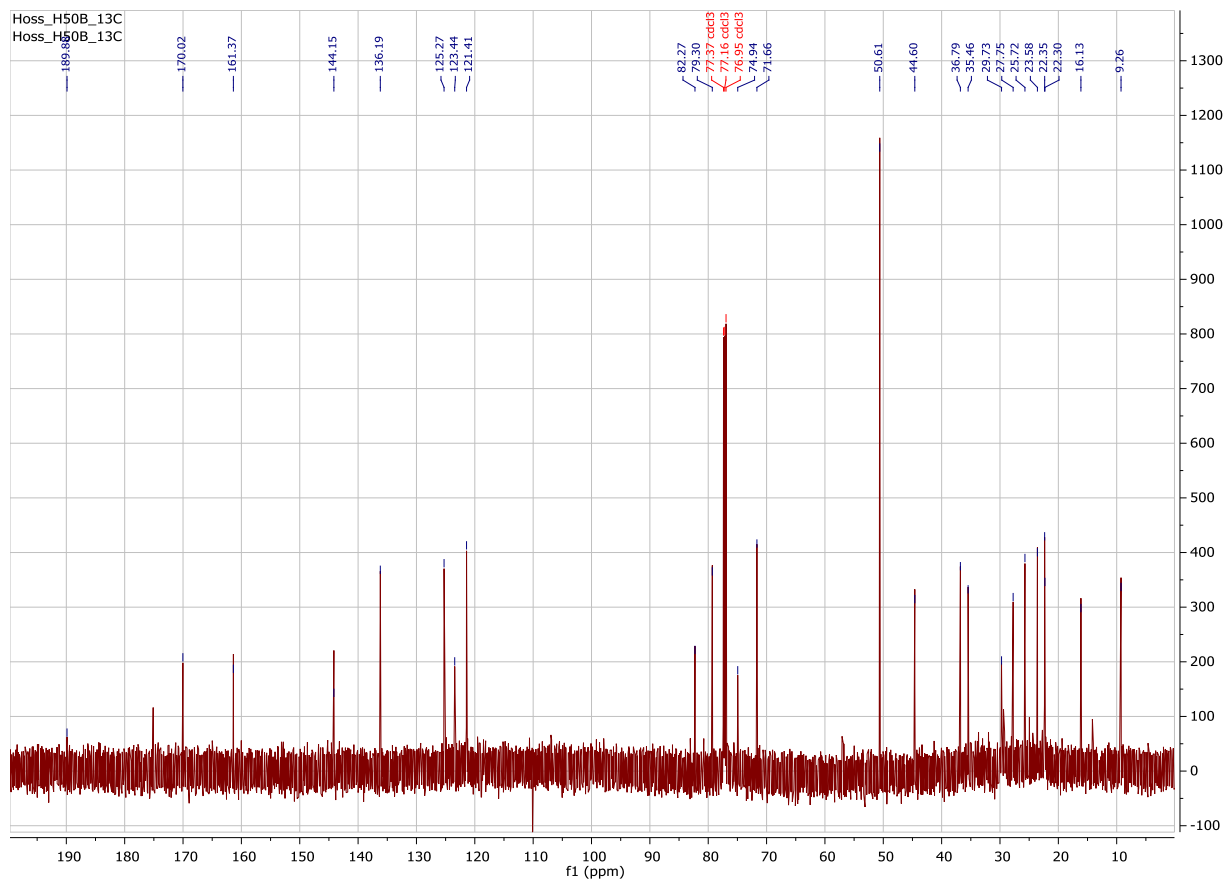

Fig.S18.The  $^{13}\text{C}$  NMR (150 MHz,  $\text{CDCl}_3$ ) spectrum of **3**

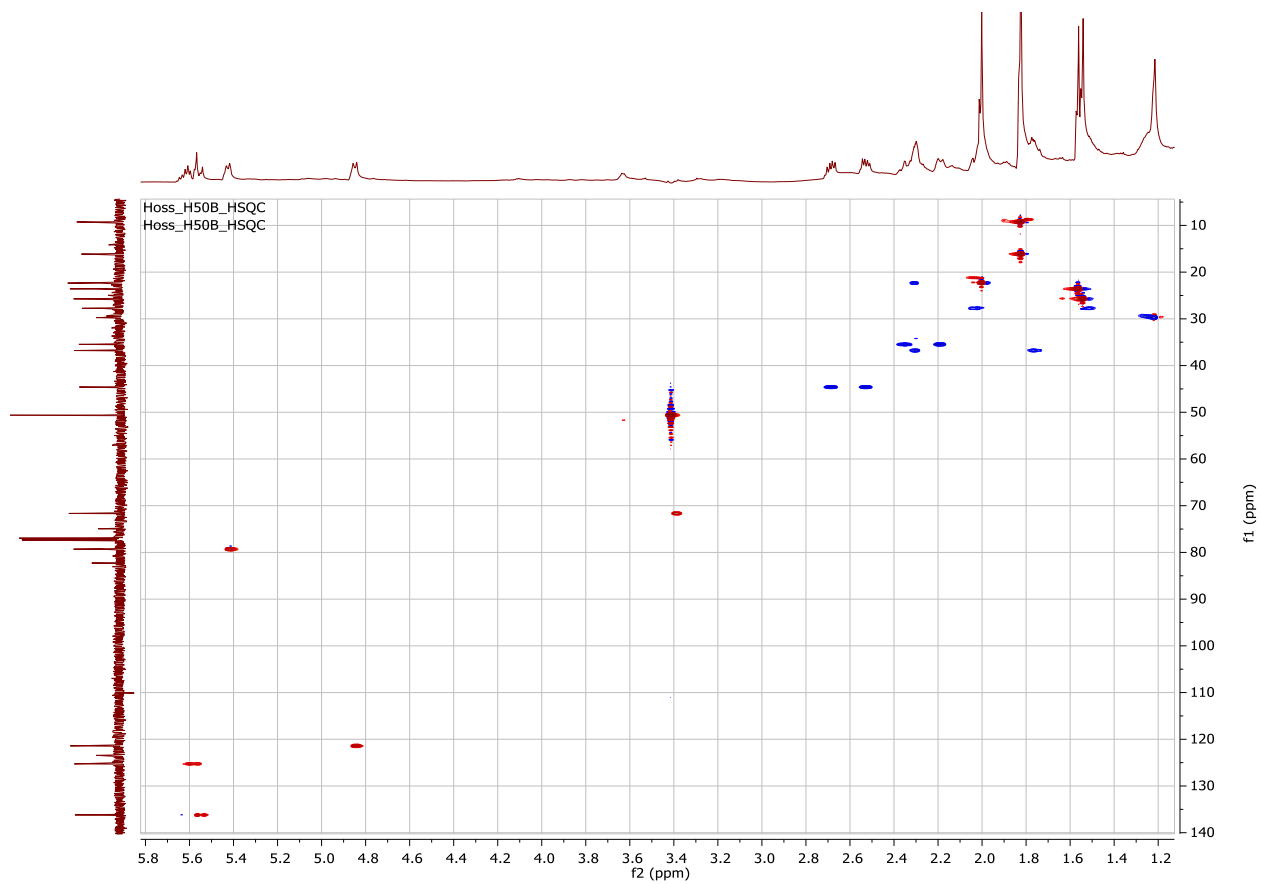

Fig.S19.The HSQC (600 MHz,  $\text{CDCl}_3$ ) spectrum of **3**

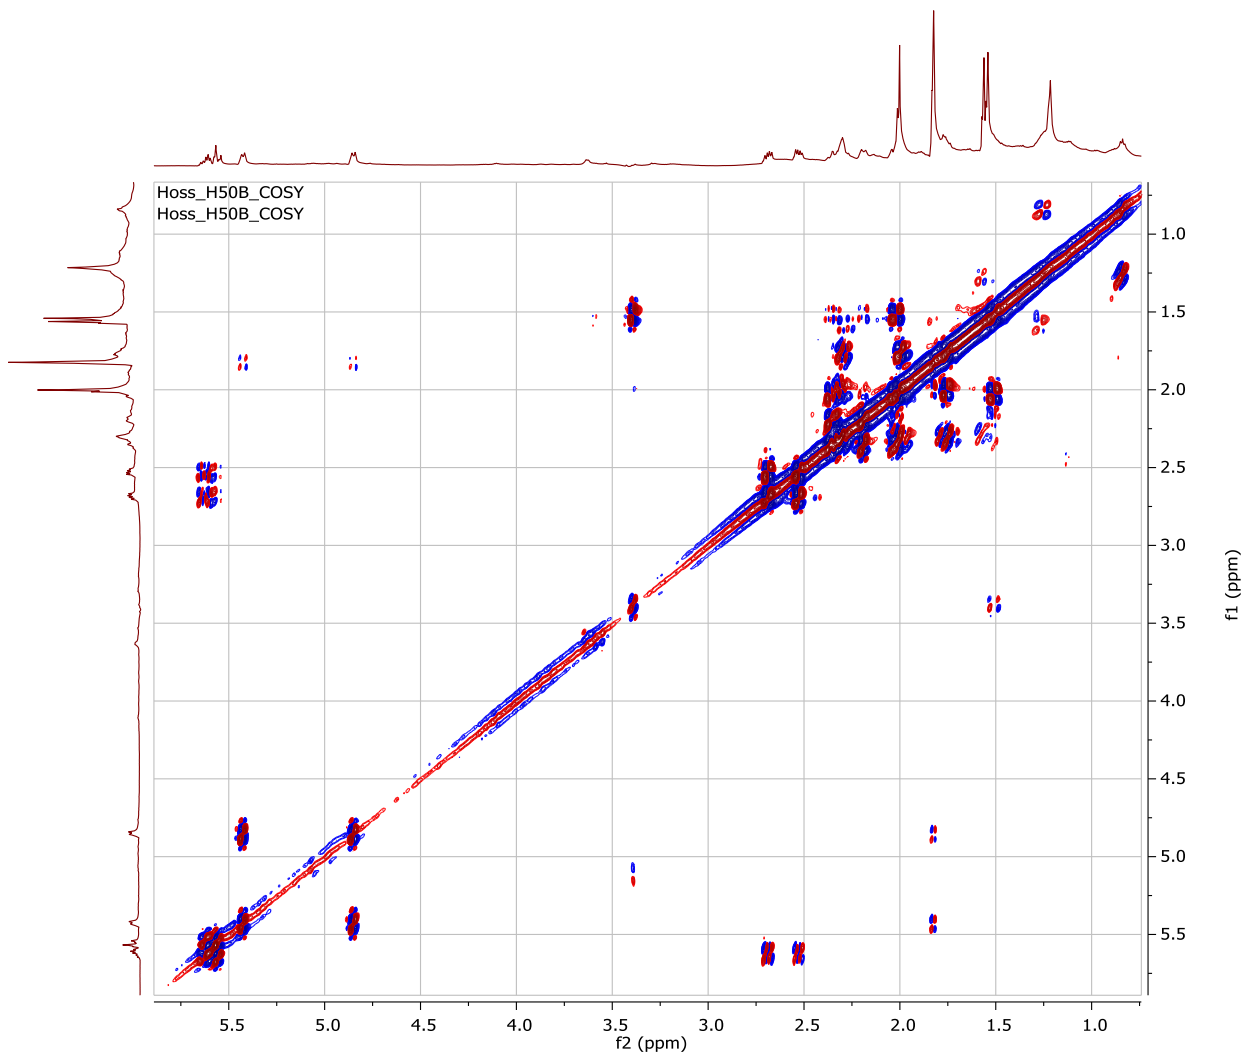

Fig.S20.The  $^1\text{H}$ - $^1\text{H}$  COSY (600 MHz,  $\text{CDCl}_3$ ) spectrum of **3**

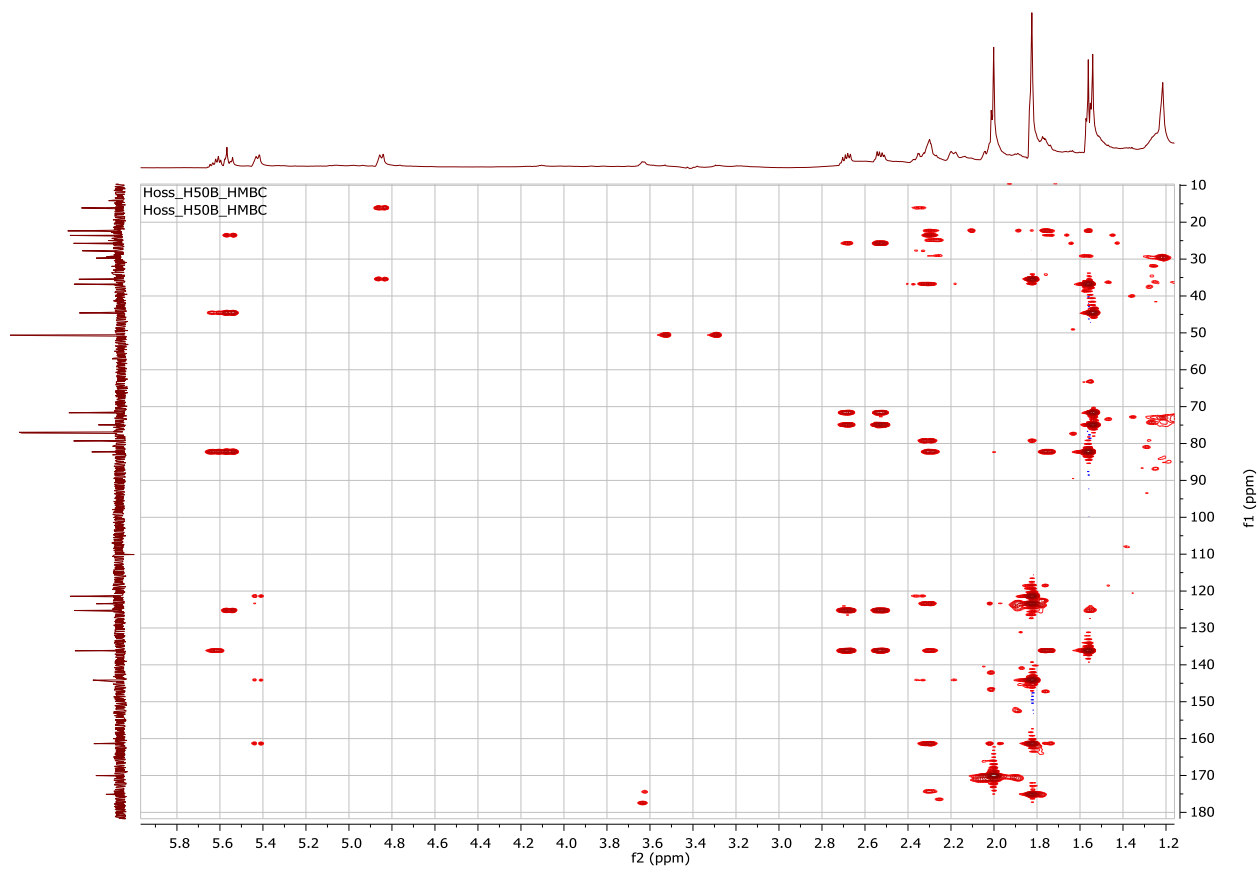

Fig.S21.The HMBC (600 MHz, CDCl<sub>3</sub>) spectrum of **3**

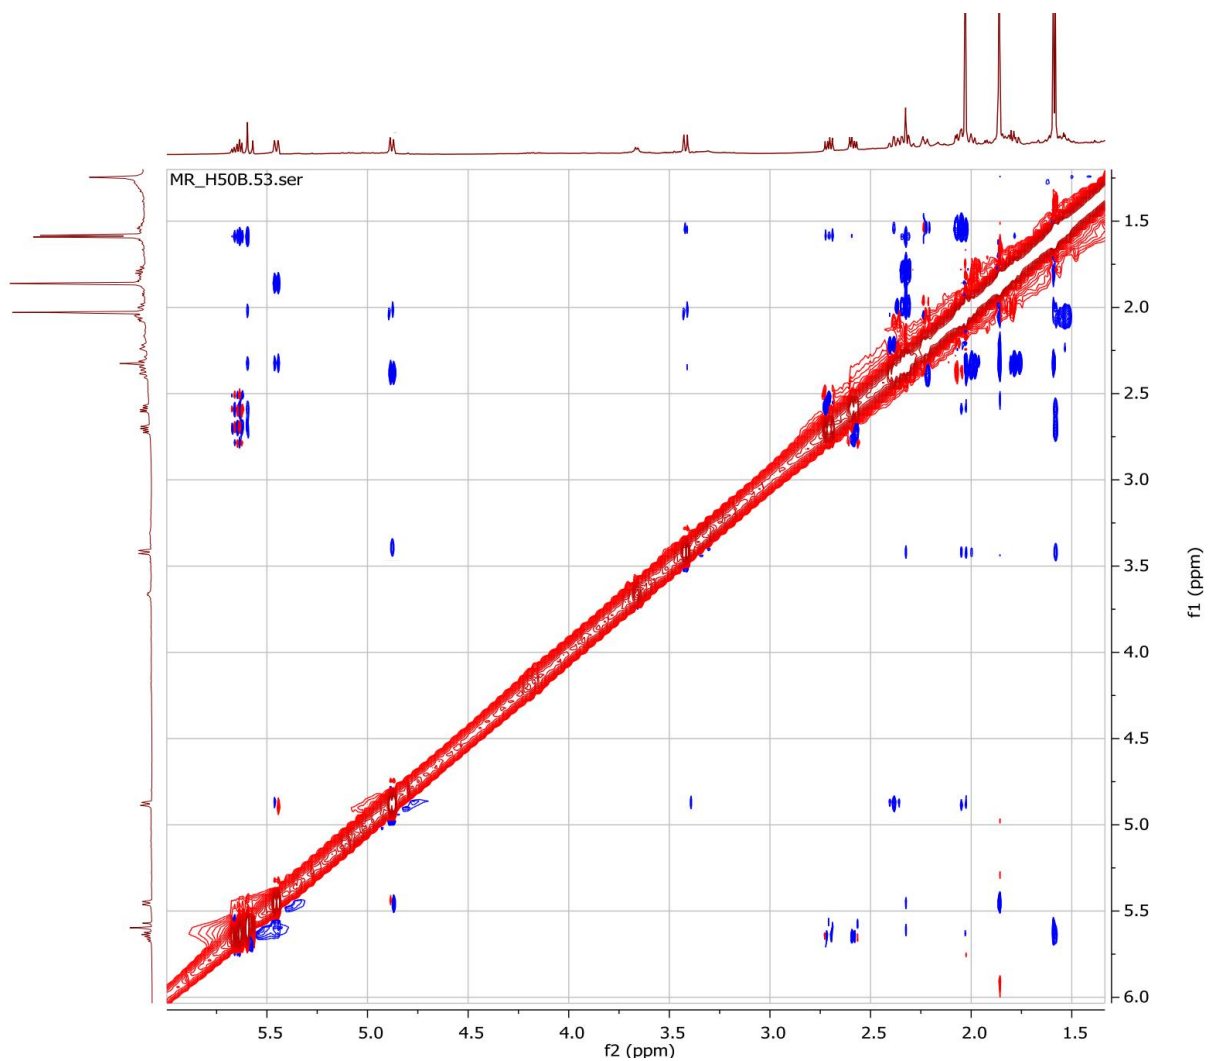

Fig.S22.The NOESY (600 MHz, CDCl<sub>3</sub>) spectrum of **3**



F: FTMS + p ESI Full ms [100.00-2000.00]

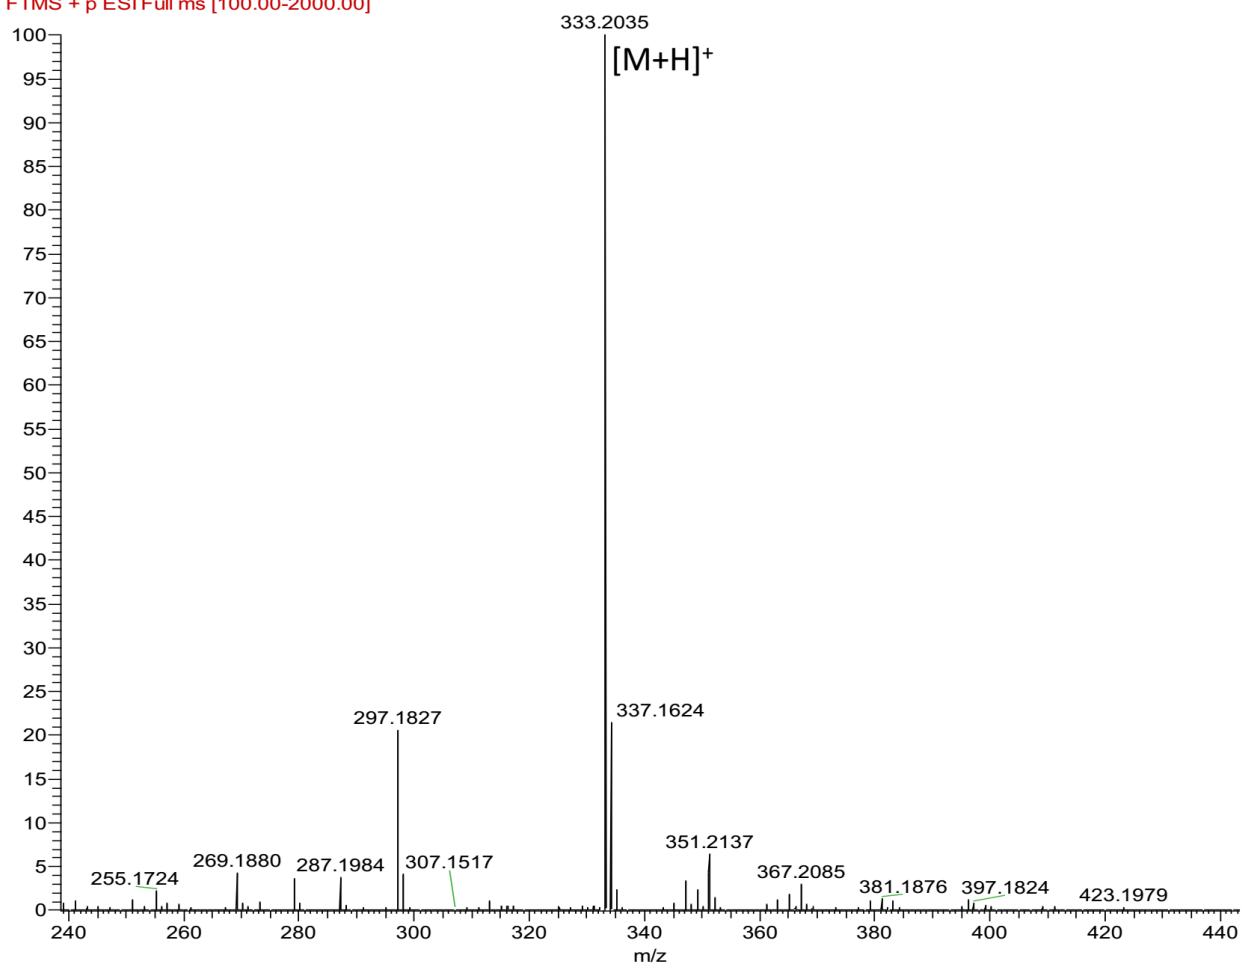

Fig.S23. The HRESIMS spectrum of **4**.



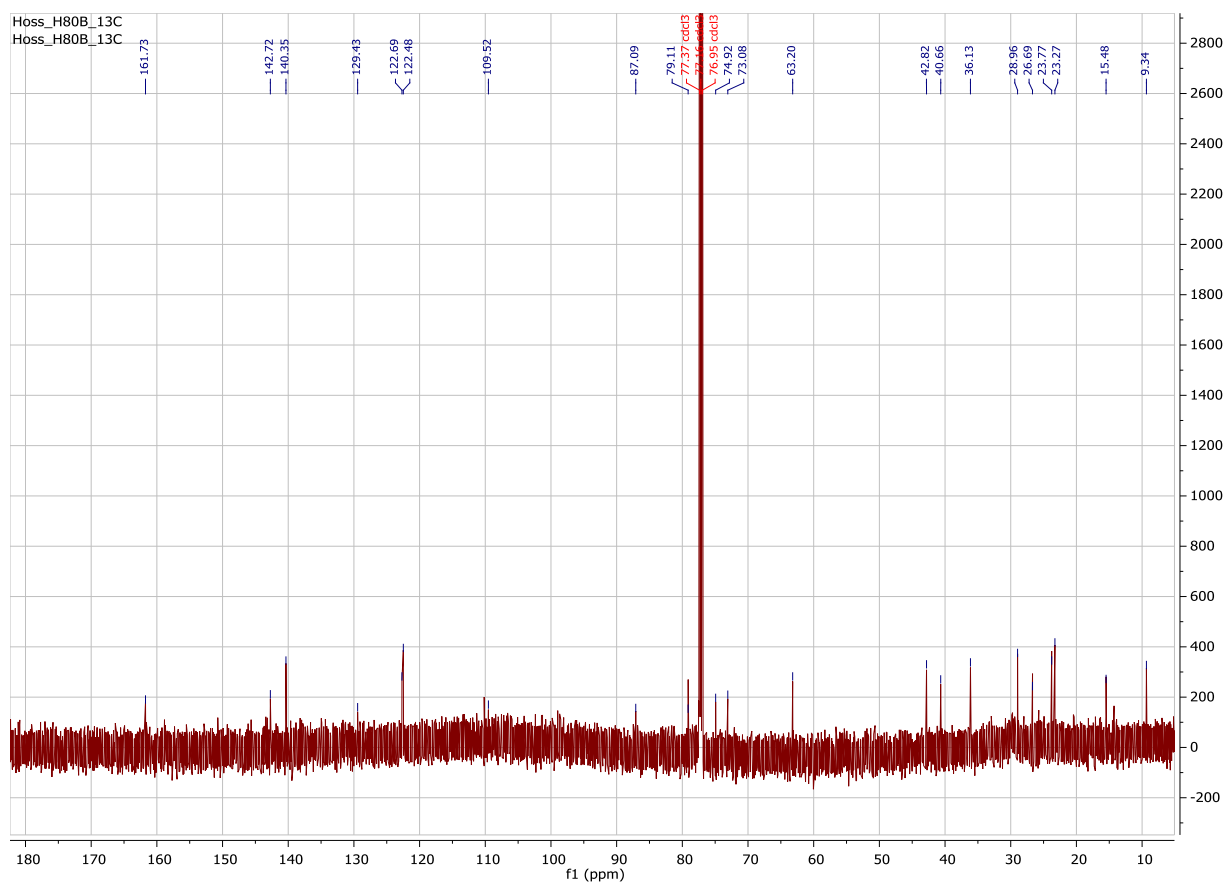

Fig.S25.The  $^{13}\text{C}$  NMR (150 MHz,  $\text{CDCl}_3$ ) spectrum of **4**

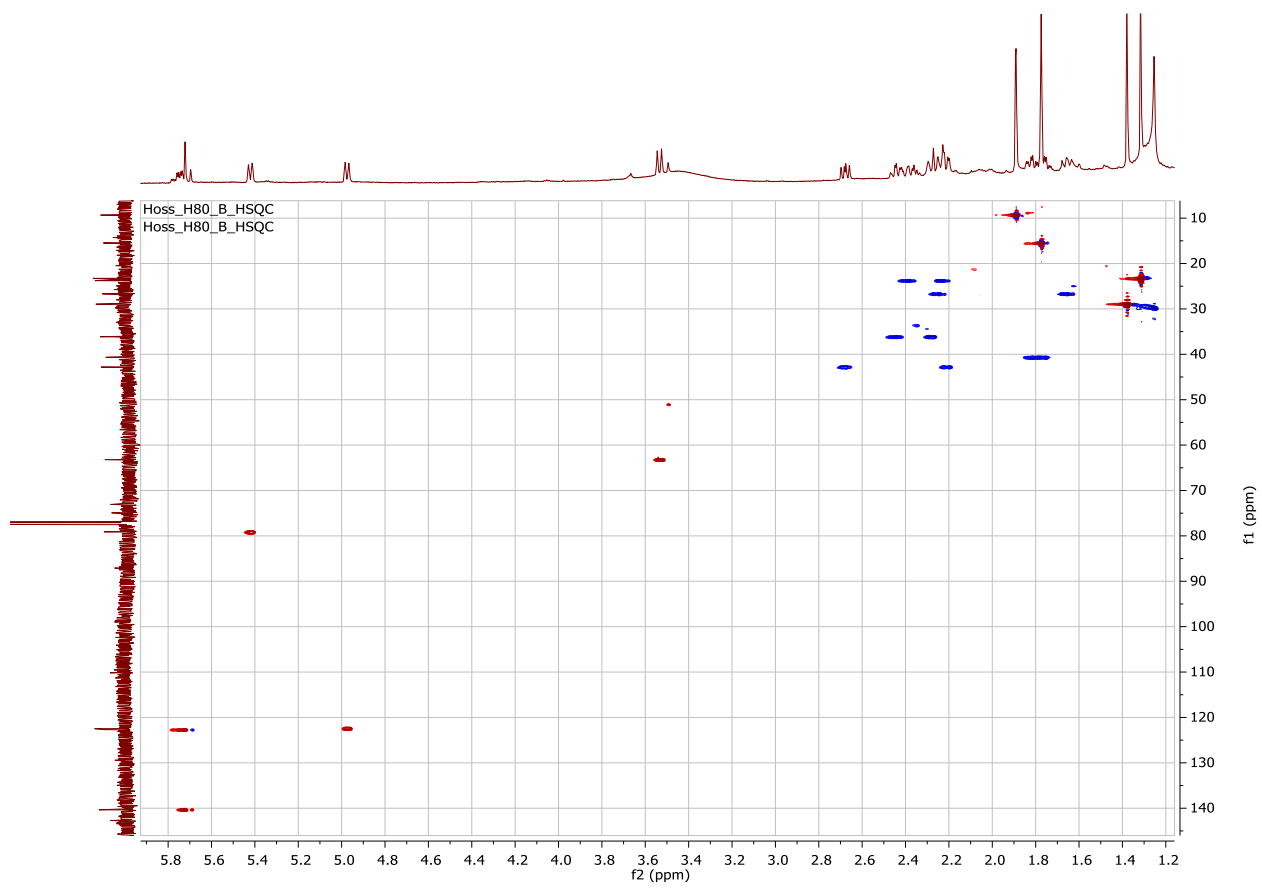

Fig.S26.The HSQC (600 MHz, CDCl<sub>3</sub>) spectrum of **4**

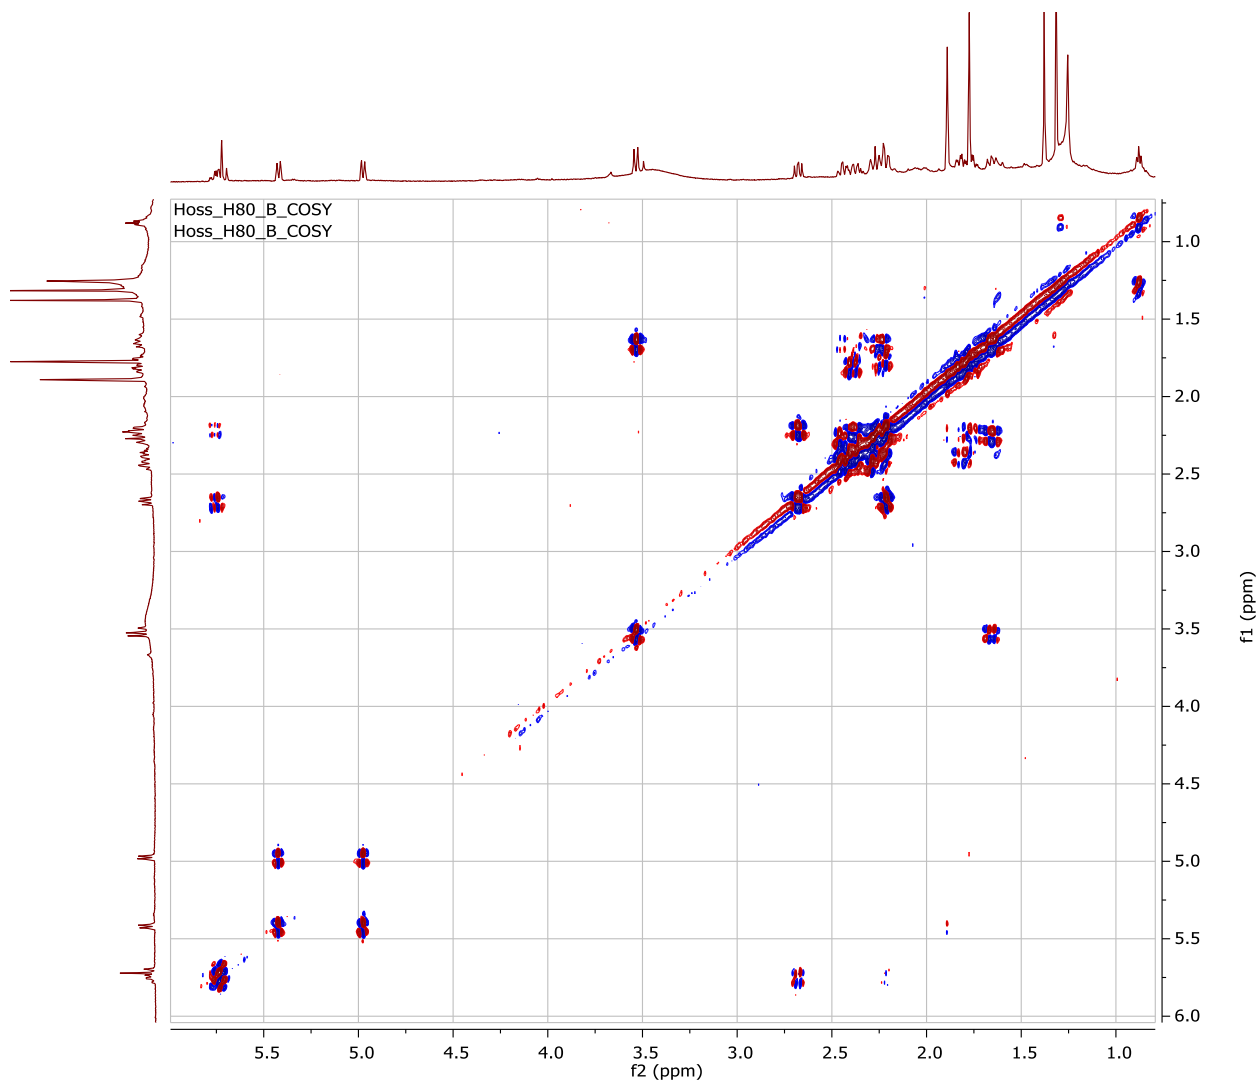

Fig.S27.The  $^1\text{H}$ - $^1\text{H}$  COSY (600 MHz,  $\text{CDCl}_3$ ) spectrum of **4**

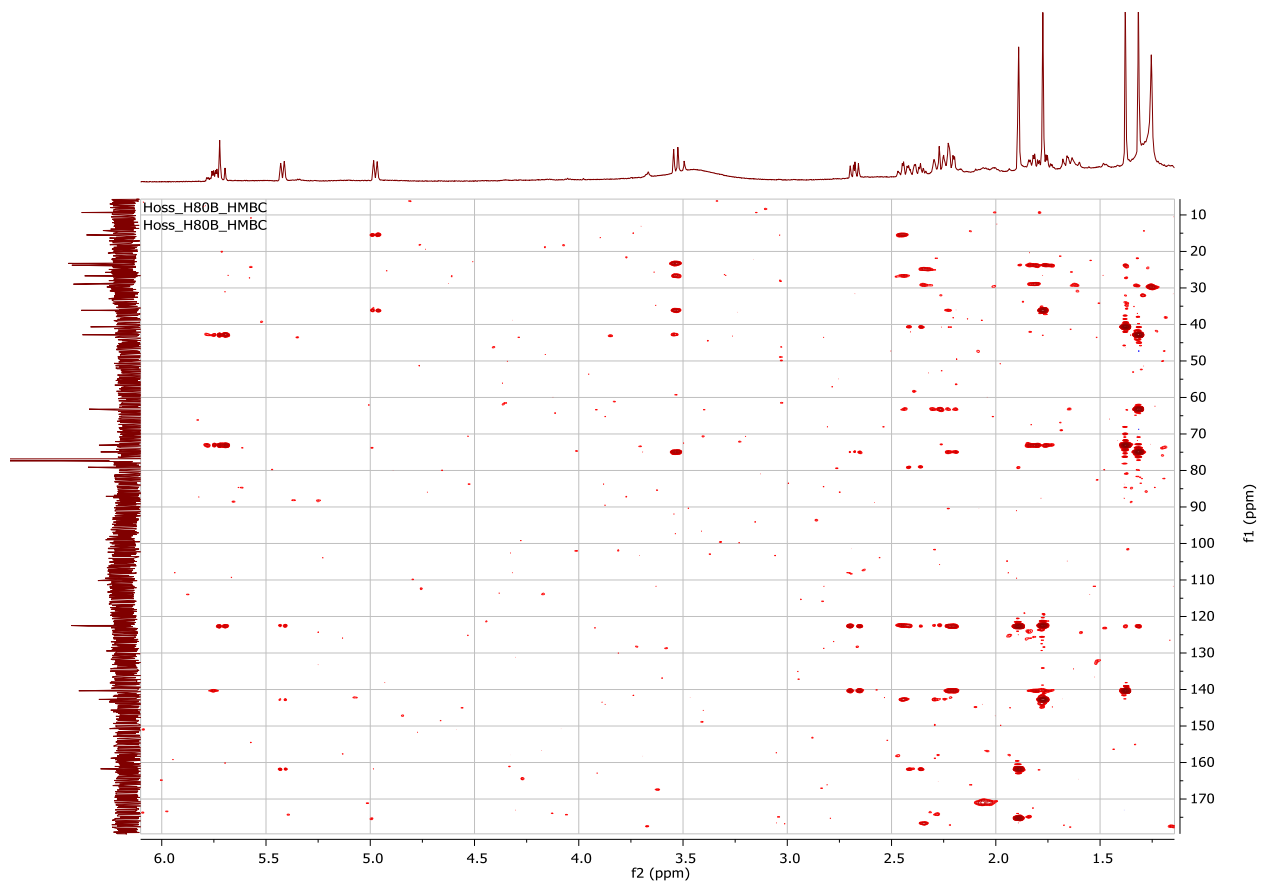

Fig.28.The HMBC (600 MHz,  $\text{CDCl}_3$ ) spectrum of **4**

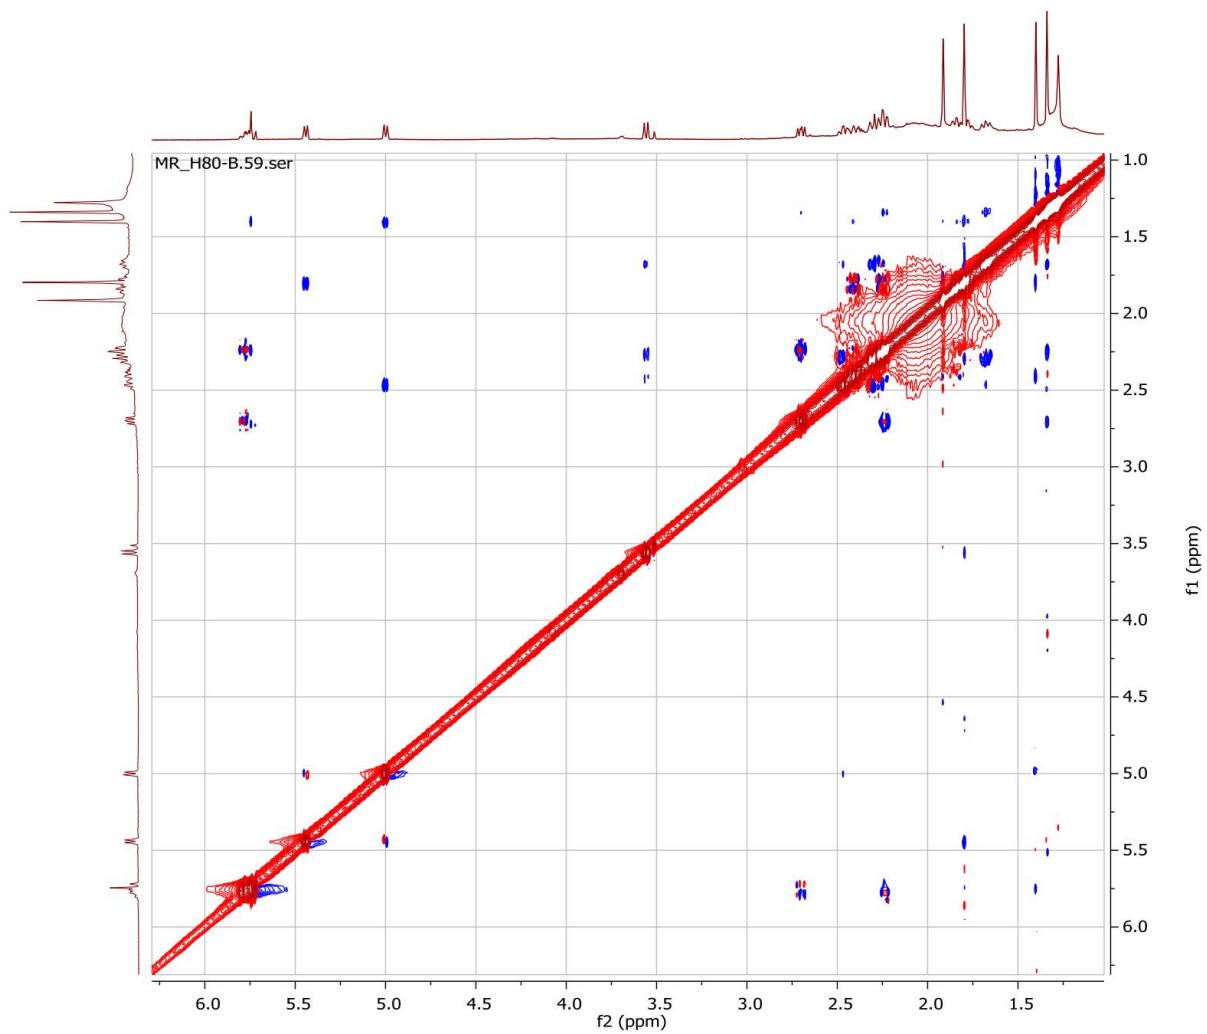

Fig.S29.The NOESY (600 MHz,  $\text{CDCl}_3$ ) spectrum of **4**

F: FTMS + p ESI Full ms [100.00-2000.00]

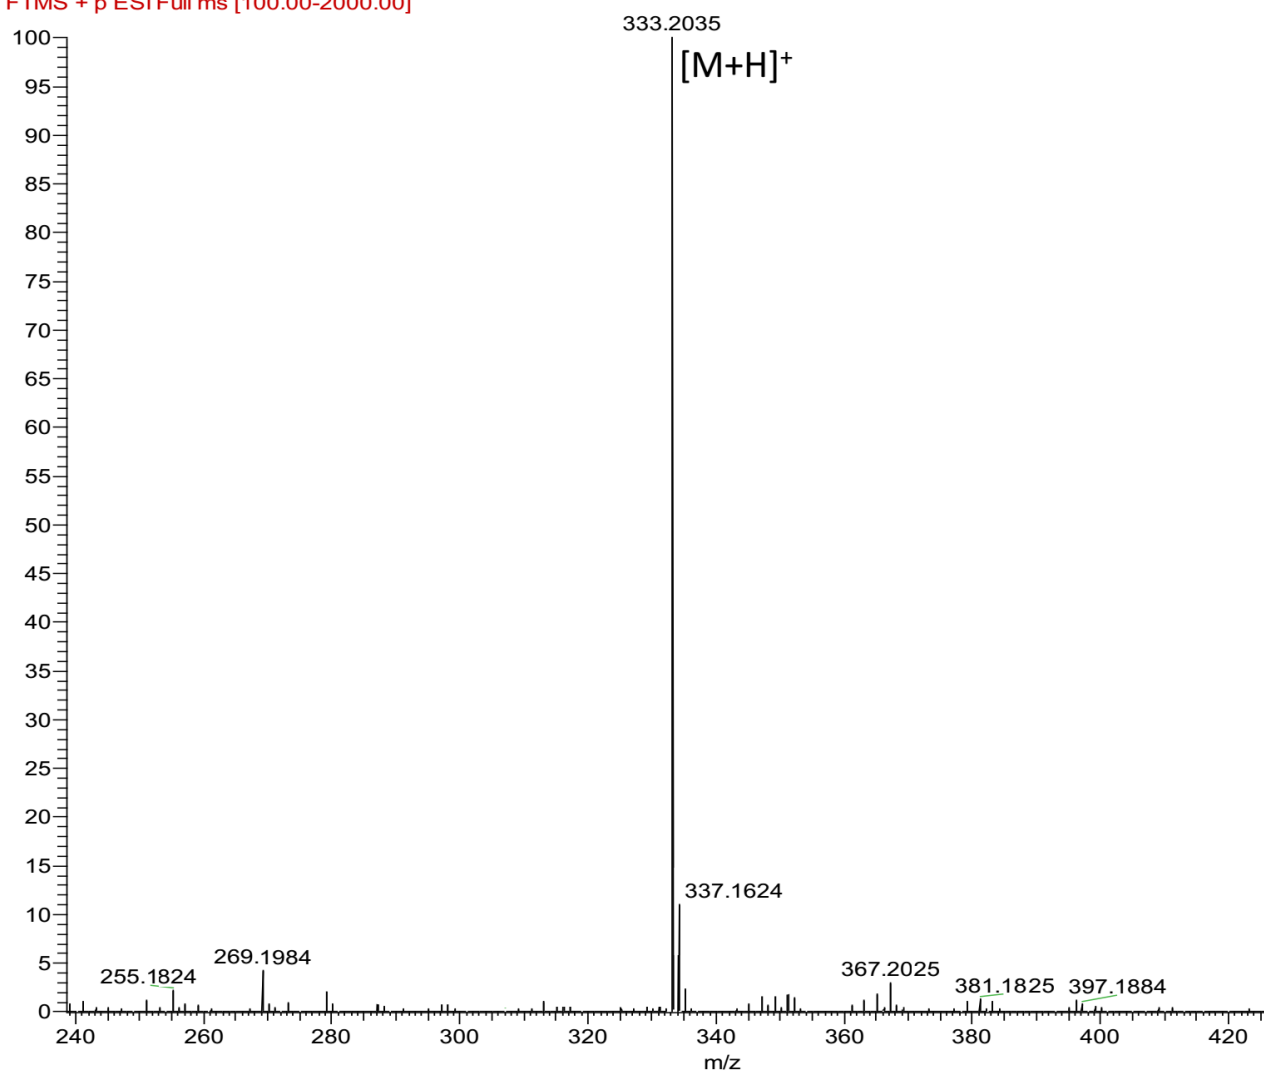

Fig.S30. The HRESIMS spectrum of **5**.



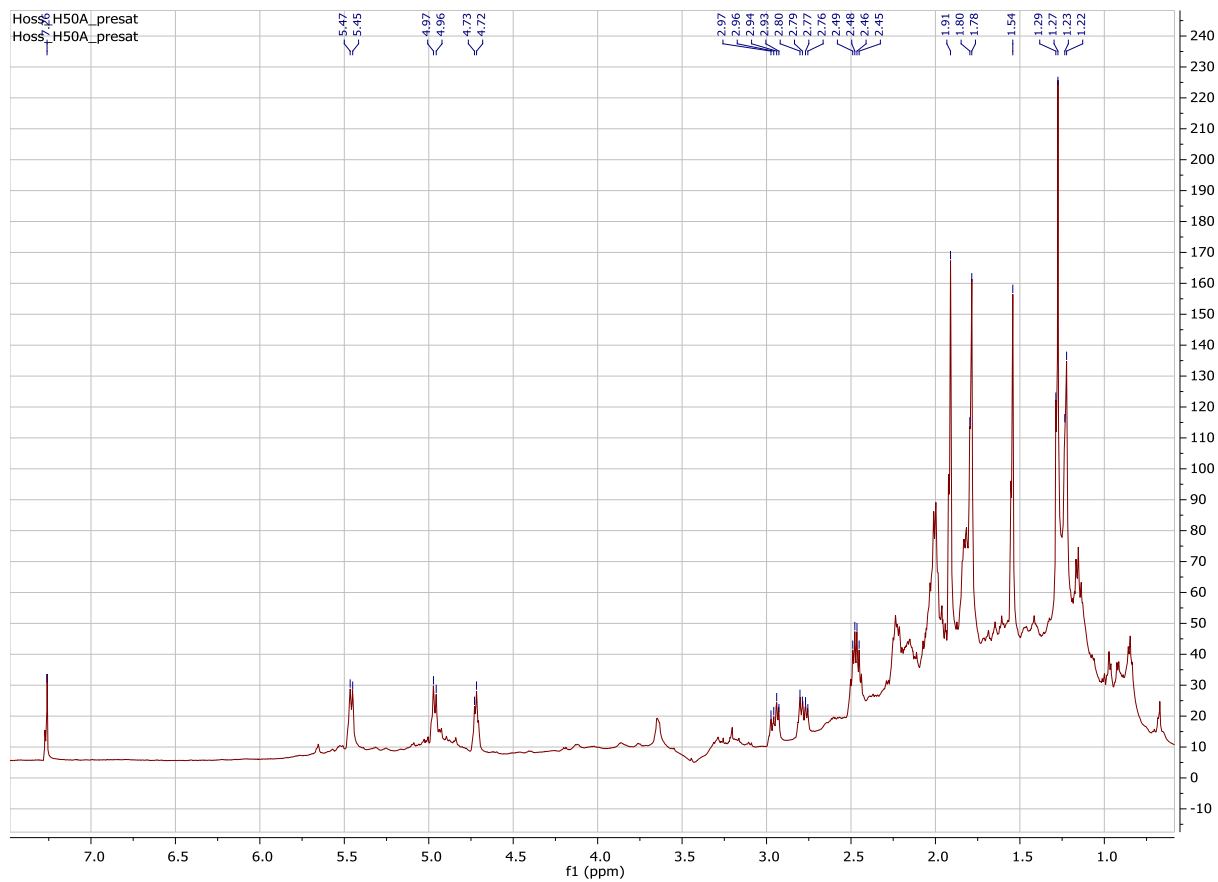

Fig.S31.The  $^1\text{H}$  NMR (600 MHz,  $\text{CDCl}_3$ ) spectrum of **5**

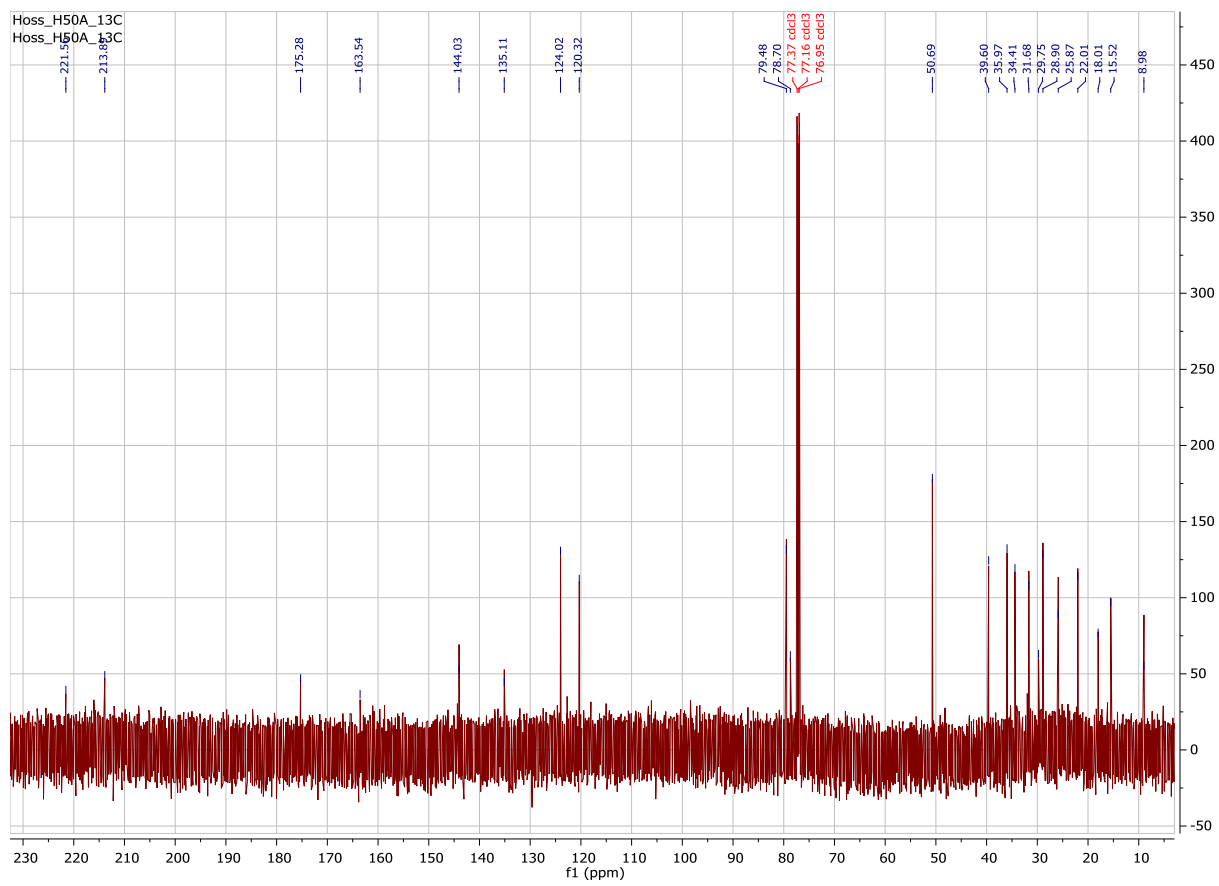

Fig.S32.The  $^{13}\text{C}$  NMR (150 MHz,  $\text{CDCl}_3$ ) spectrum of **5**

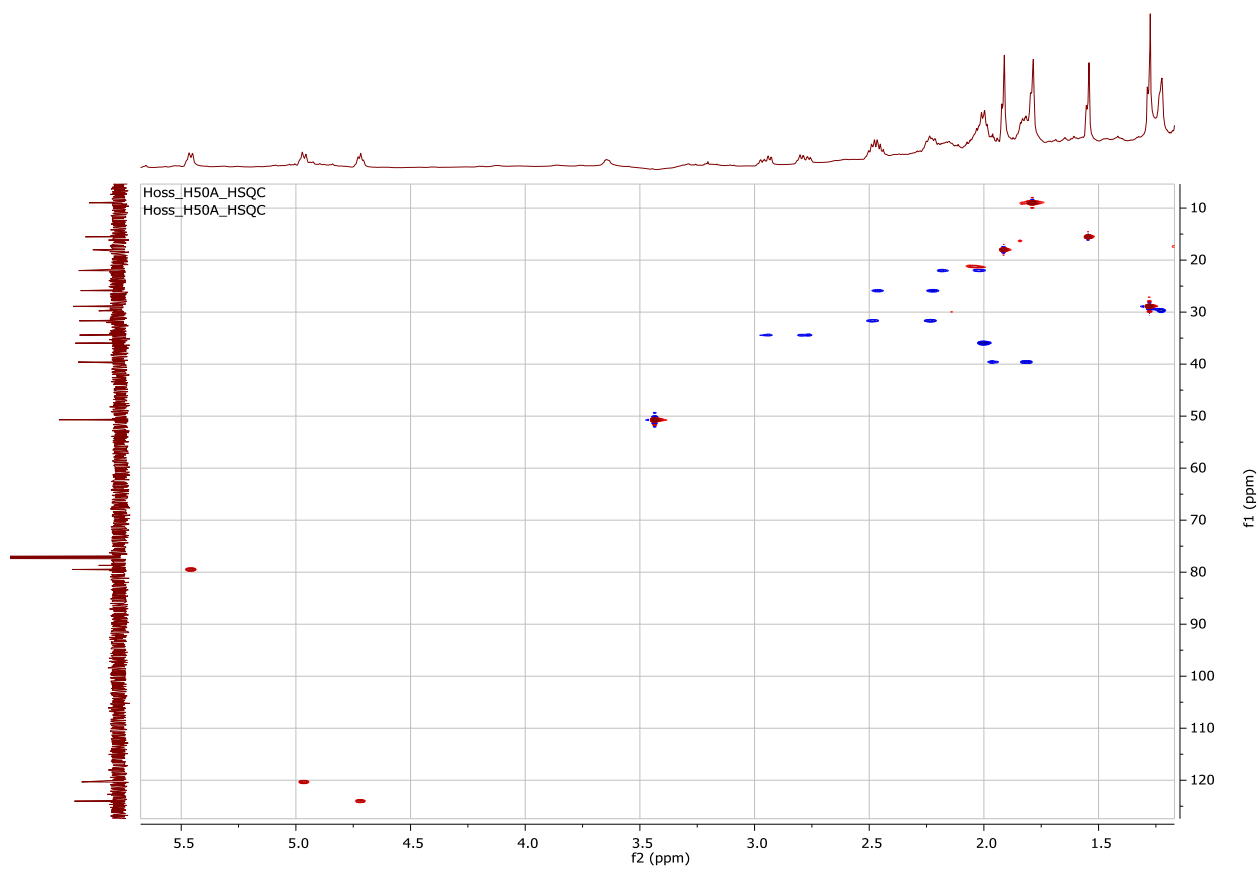

Fig.S33.The HSQC (600 MHz,  $\text{CDCl}_3$ ) spectrum of **5**

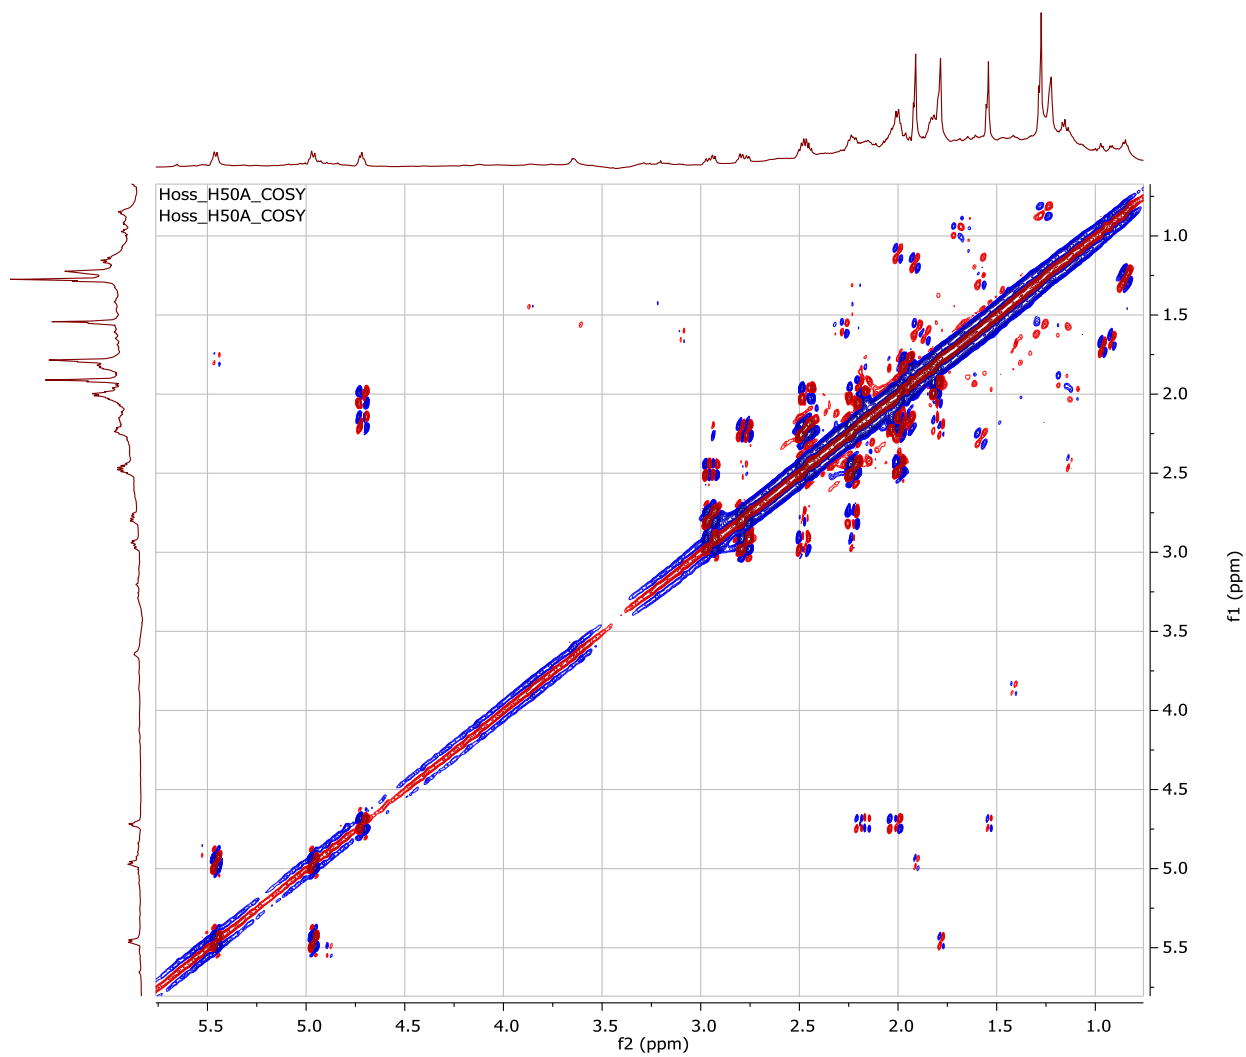

Fig.S34.The  $^1\text{H}$ - $^1\text{H}$  COSY (600 MHz,  $\text{CDCl}_3$ ) spectrum of **5**

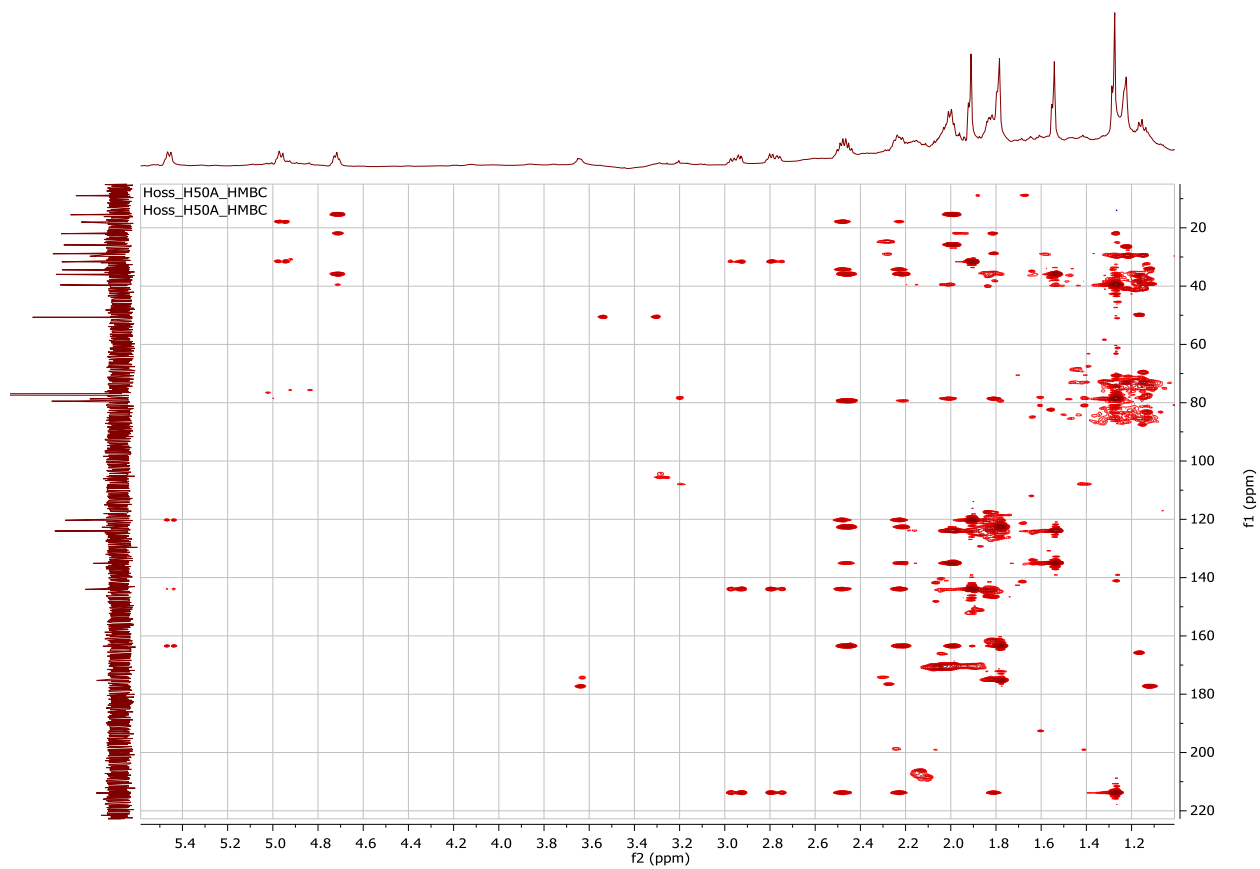

Fig.S35.The HMBC (600 MHz, CDCl<sub>3</sub>) spectrum of **5**

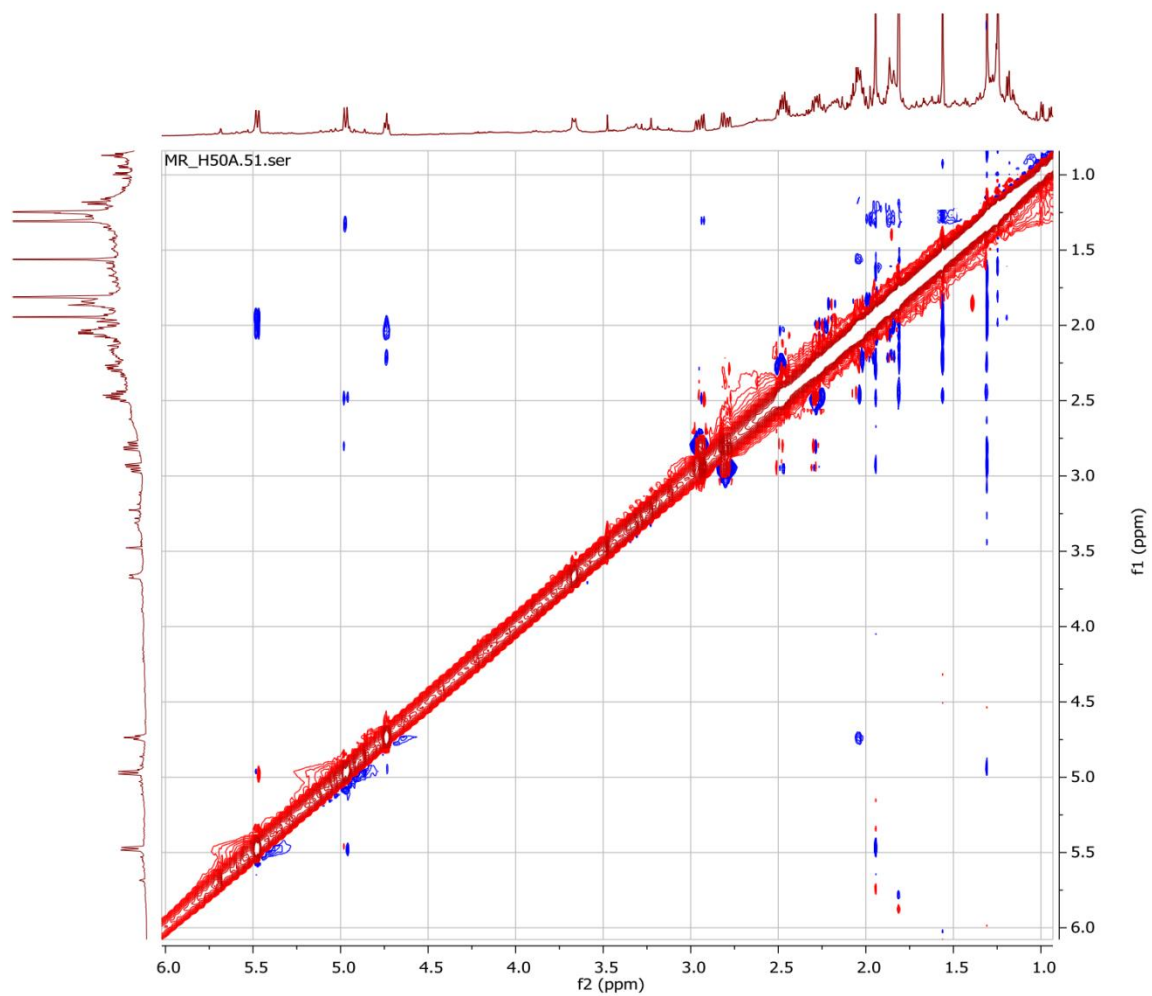

Fig.S36.The NOESY (600 MHz,  $\text{CDCl}_3$ ) spectrum of **5**
